# Supplementary material for: Isolation and In Silico Prediction of Potential Drug-like Compounds with a New Dimeric Prenylated Quinolone Alkaloid from Zanthoxylum rhetsa (Roxb.) Root Extracts Targeted against SARS-CoV-2 (Mpro)
Source: MDPI journal article supplement (doi:10.3390/molecules27238191), 2022-11-24

**Supplementary Materials:** NMR spectrum of compound 1 characterized as a new dimeric prenylated quinolone 2,11-didemethoxy-vepidimerine A

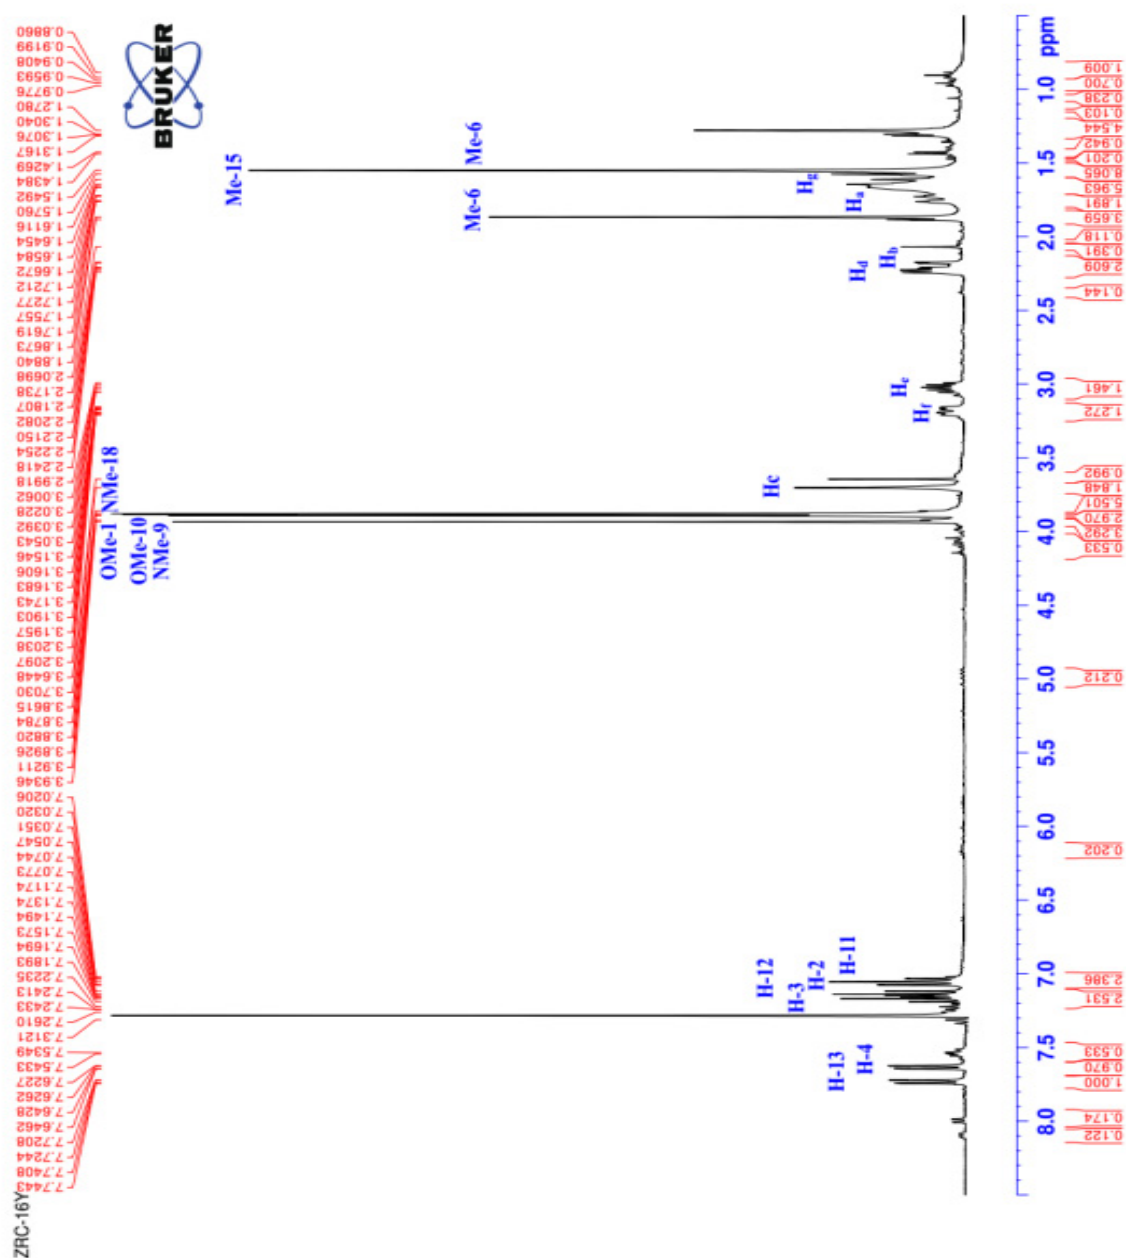

**Figure S1.**  $^1\text{H}$  NMR (400 MHz,  $\text{CDCl}_3$ ) spectrum of Compound **1** (ZRC-16Y).

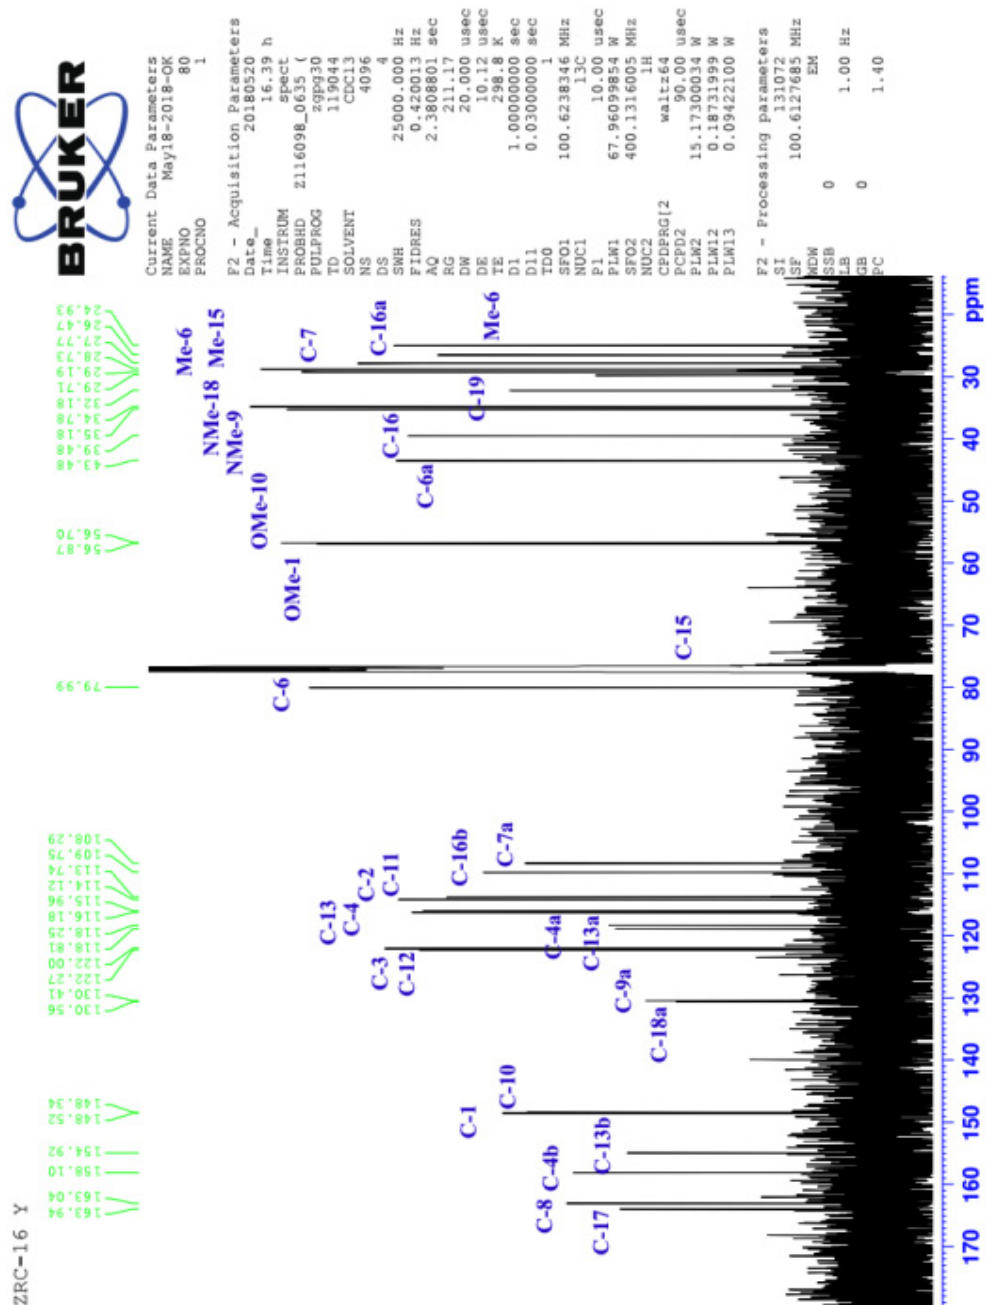

Figure S2.  $^{13}\text{C}$  NMR (100 MHz,  $\text{CDCl}_3$ ) spectrum of compound **1** (ZRC-16Y)

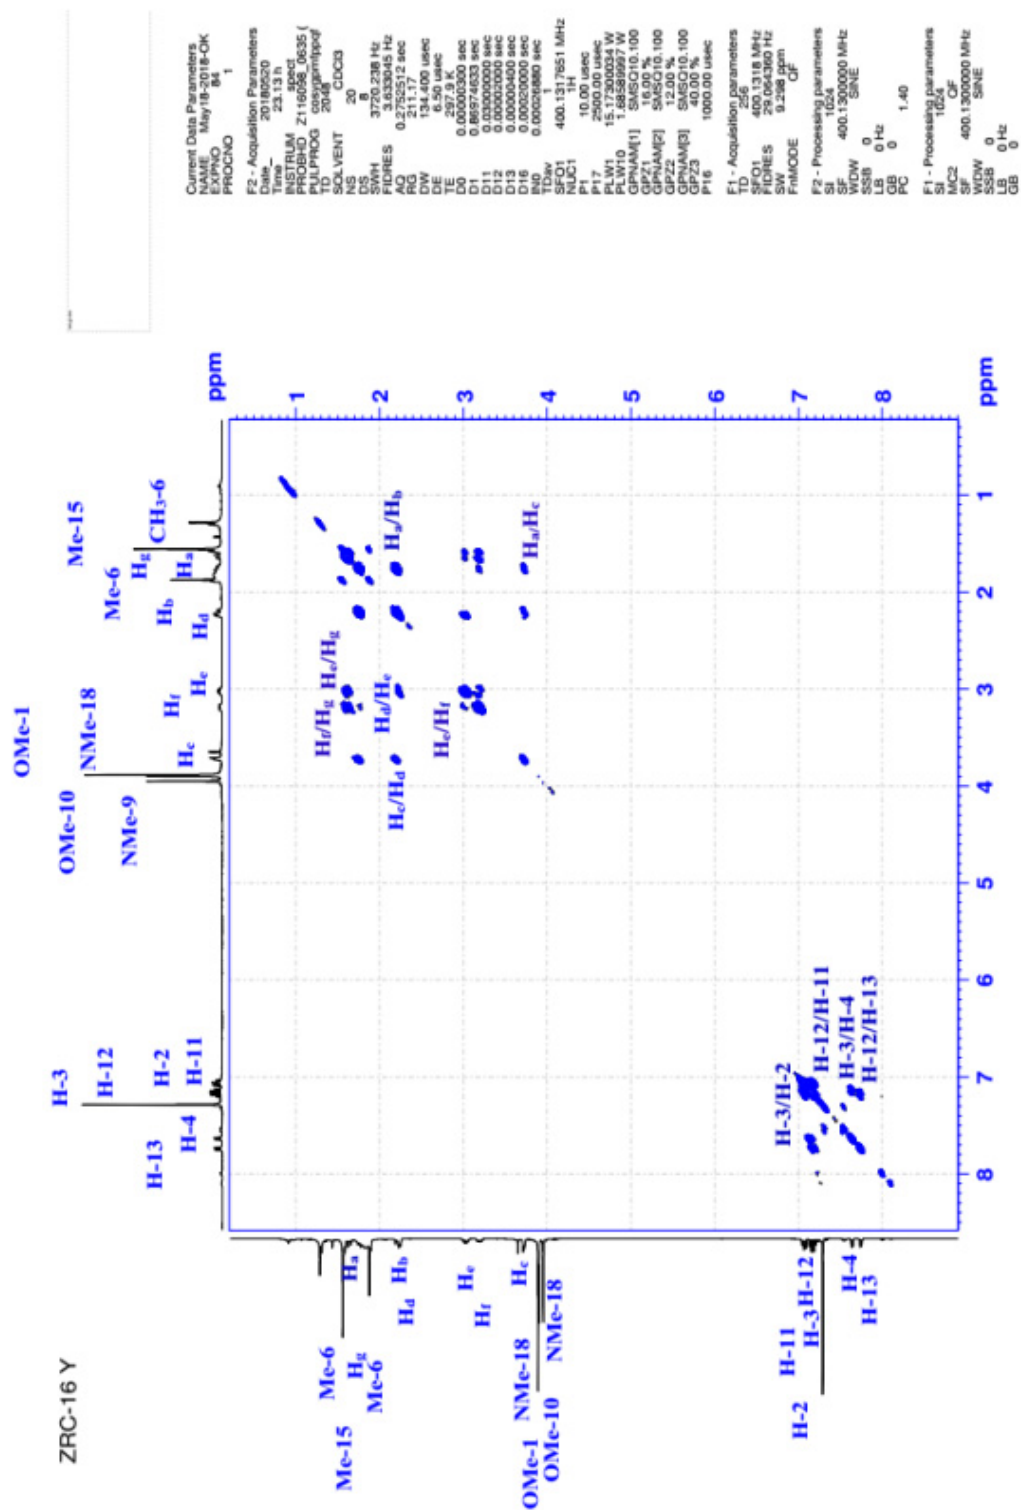

**Figure S3.** COSY (400 MHz, CDCl<sub>3</sub>) spectrum of compound **1** (ZRC-16Y)

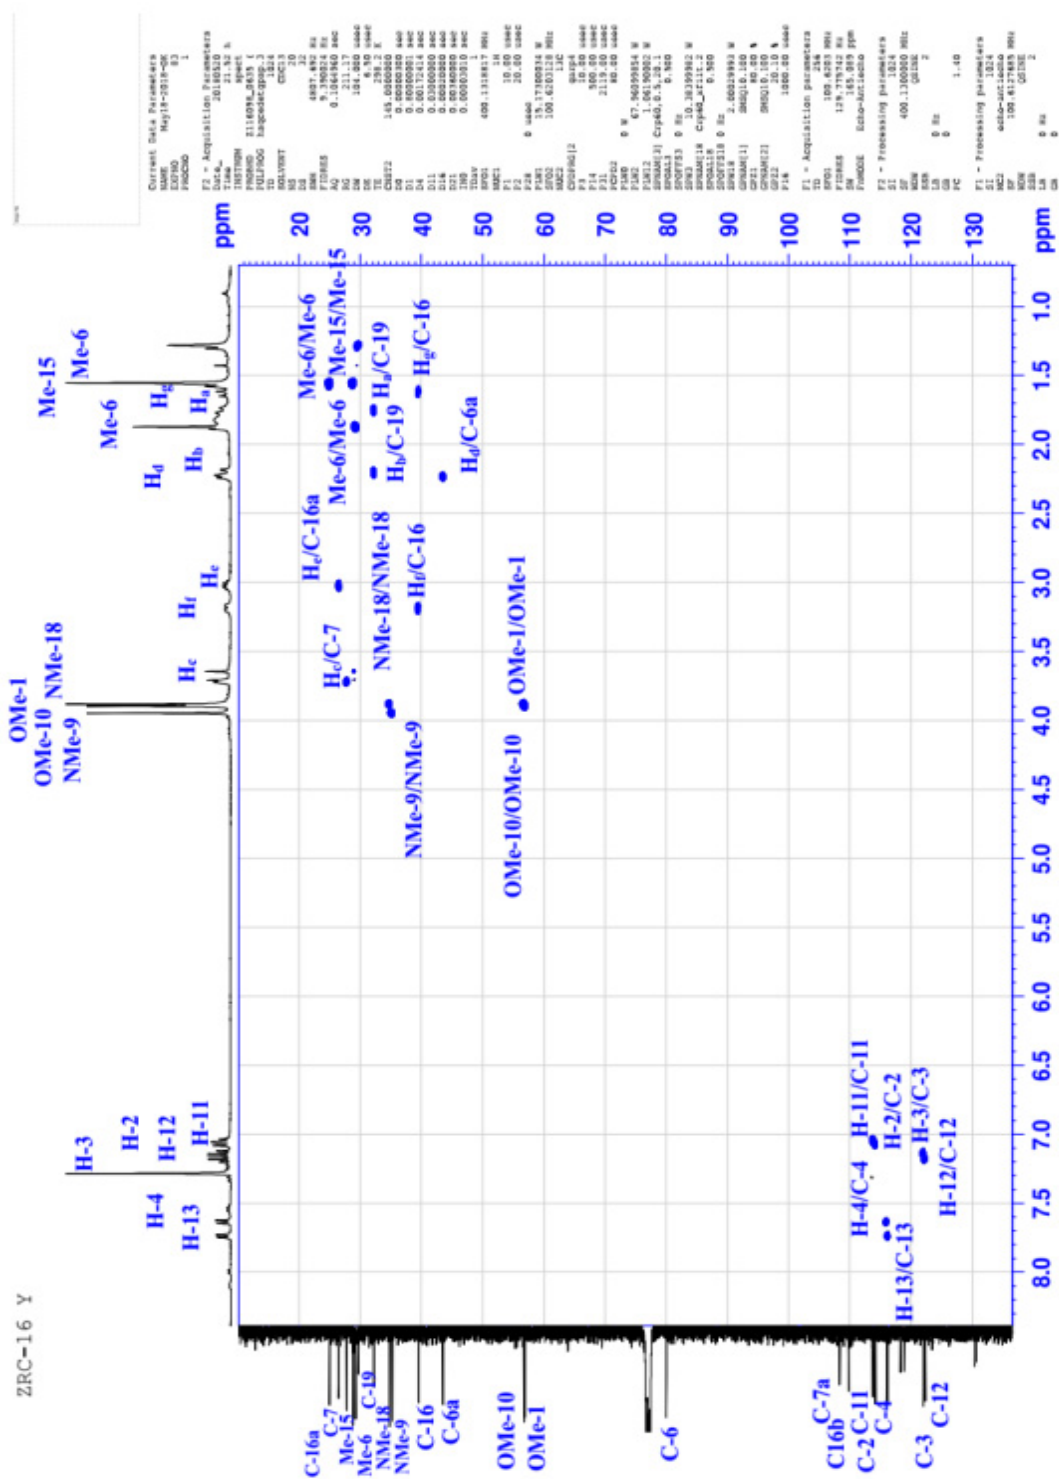Figure S4. HSQC (400 MHz, CDCl<sub>3</sub>) spectrum of compound 1 (ZRC-16Y)



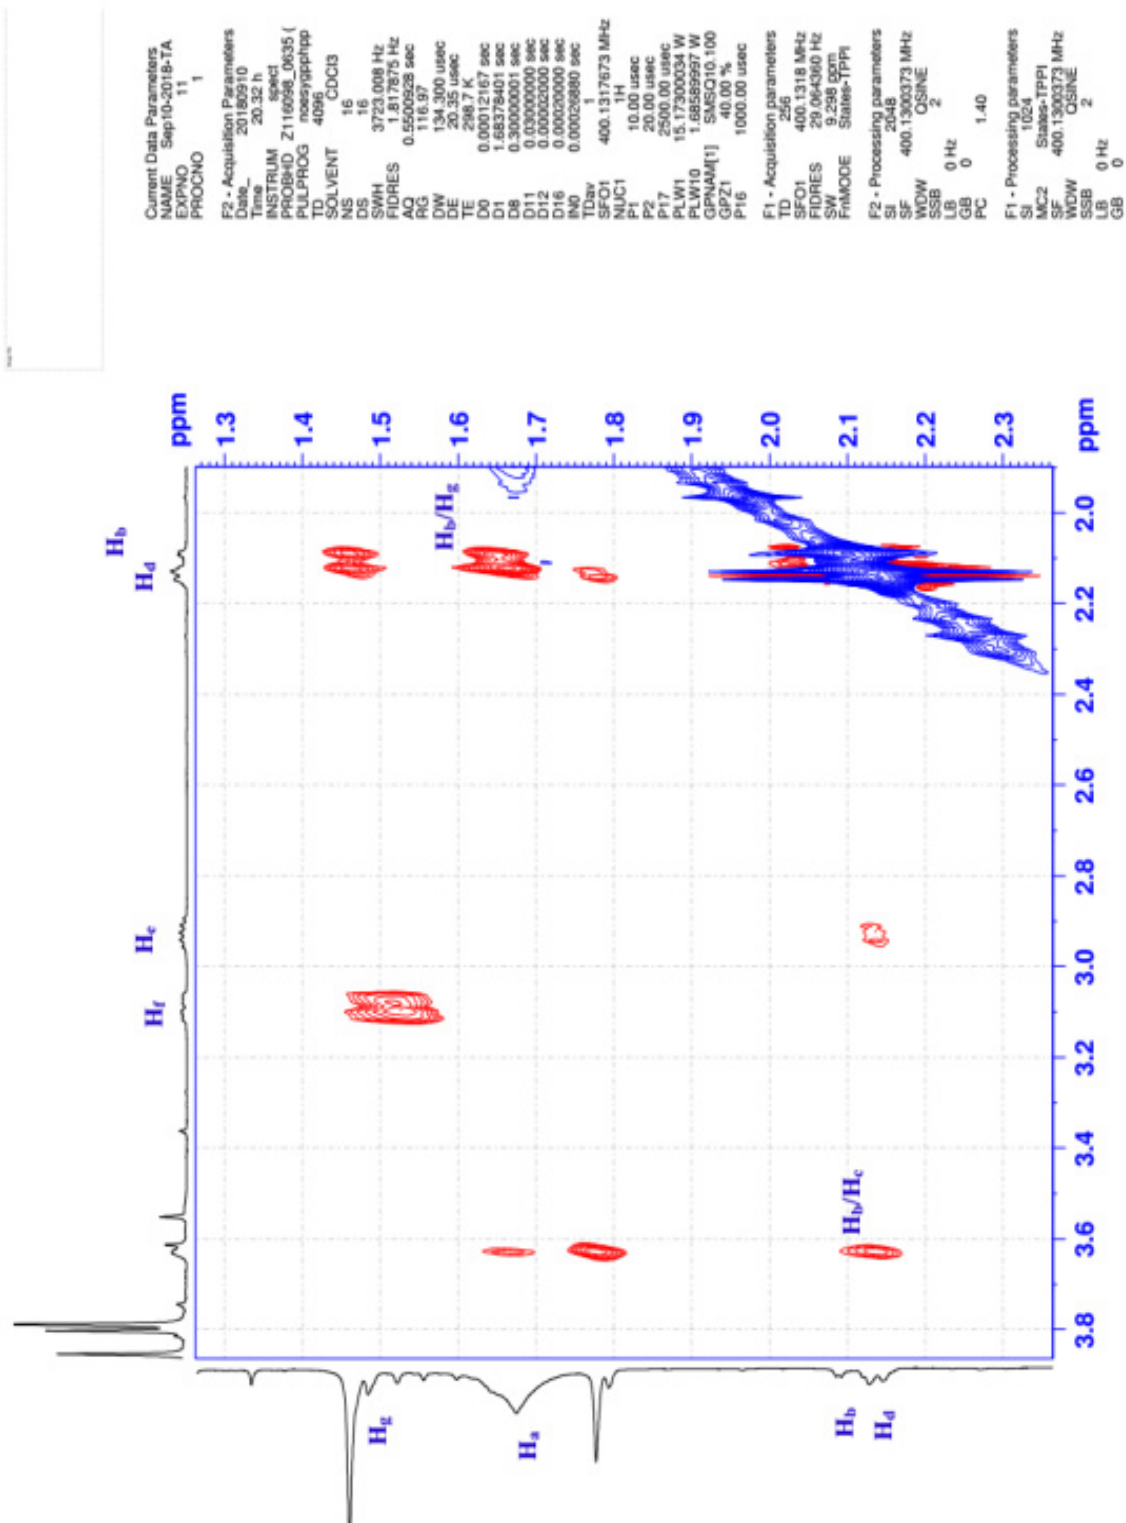

**Figure S6.** NOSY (400 MHz, CDCl<sub>3</sub>) spectrum of compound 1 (ZRC-16Y)



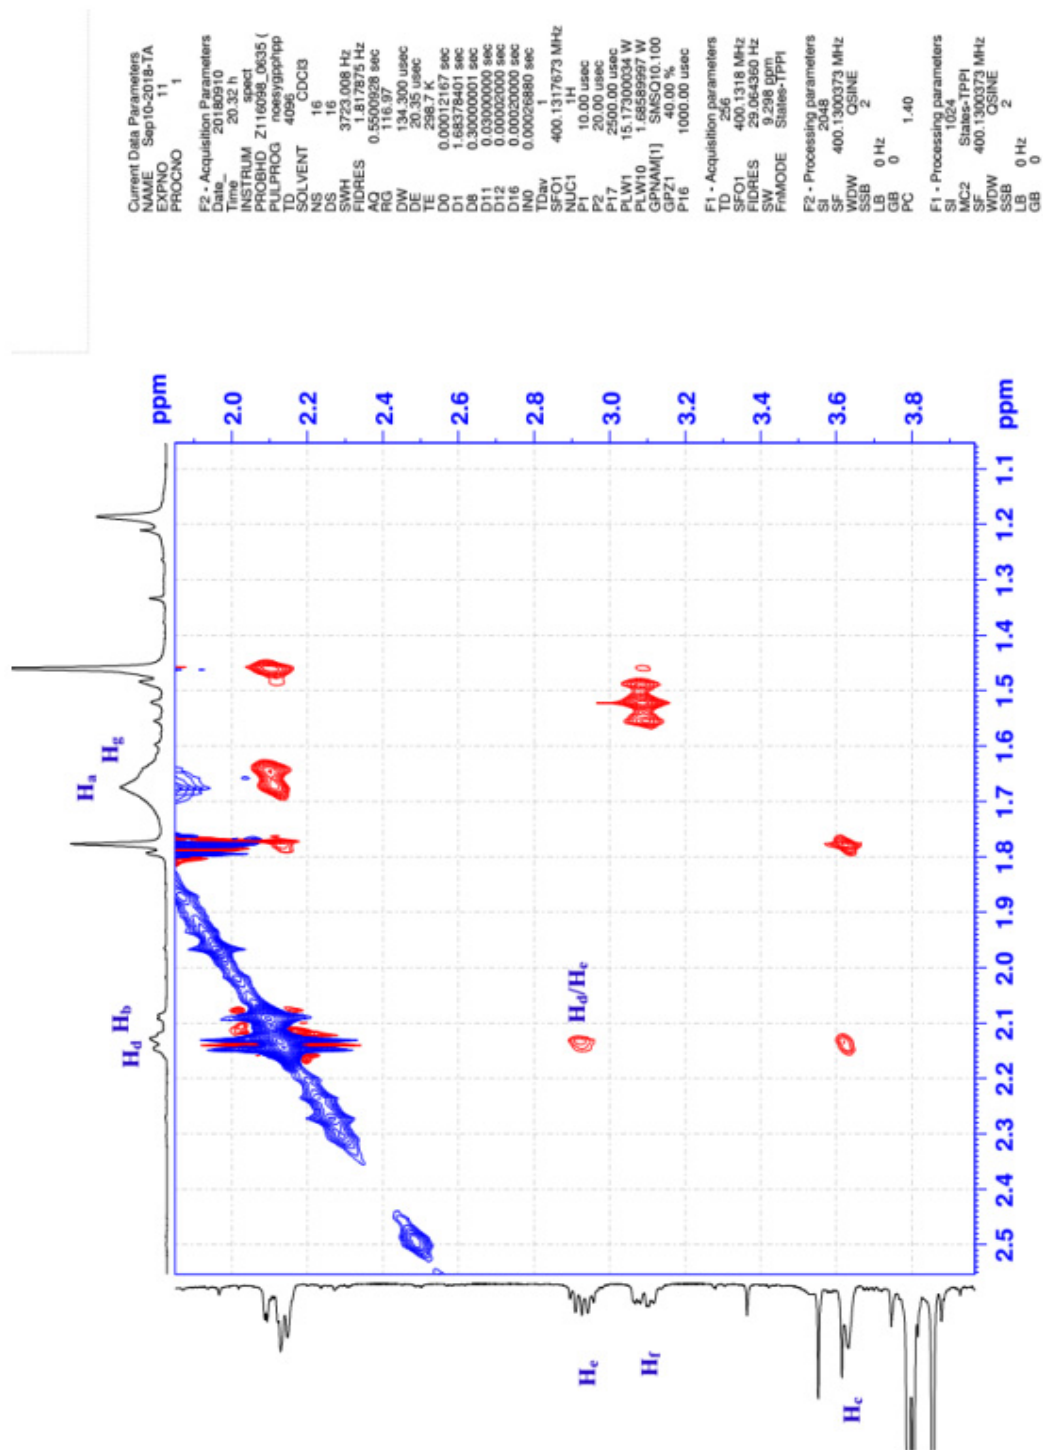

Figure S7. NOSEY (400 MHz, CDCl<sub>3</sub>) spectrum of compound **1** (ZRC-16Y)

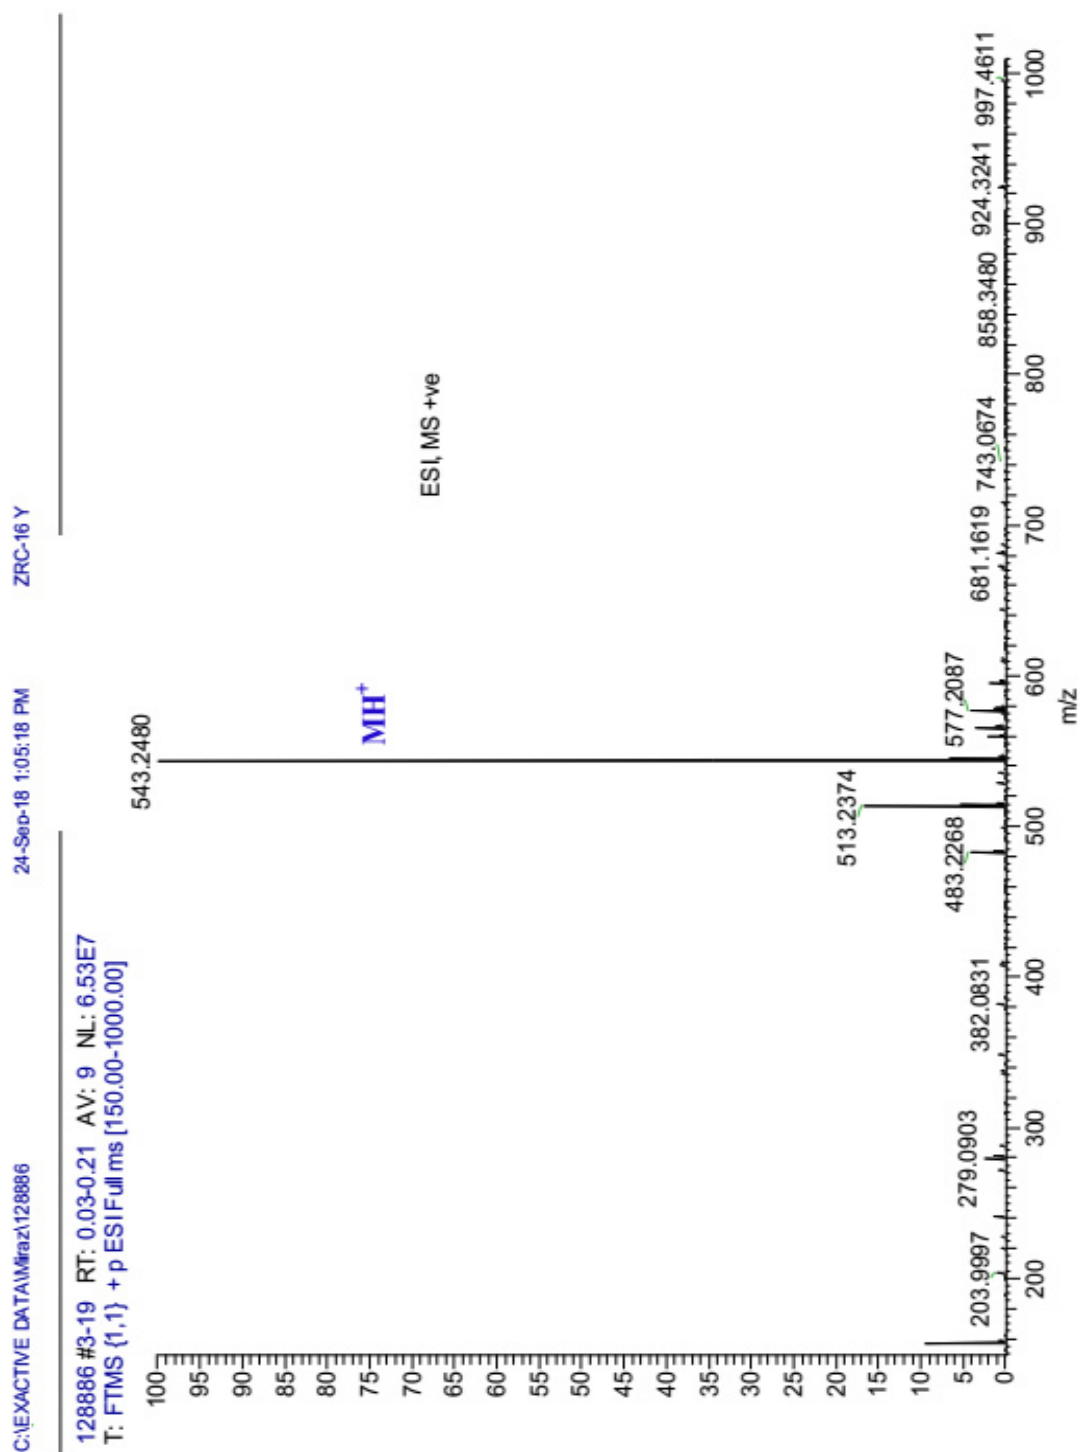

Figure S8. Mass spectrum of compound **1** (ZRC-16Y)



### Characterization of Compound **2** and **3** (ZRP-14) as *N*-methyllatanine and 3-dimethylallyl-4,8-dimethoxy-1-methyl-2-quinolone

ZRP-14 was isolated as a greenish gum, showed a blue fluorescent spot under UV light at 366 nm on a TLC plate and did not give any color after spraying with vanillin-sulfuric acid reagent followed by heating for 2 minutes.

The  $^1\text{H}$  NMR spectrum (400 MHz,  $\text{CDCl}_3$ ; Figure S9) of ZRP-14 indicated a mixture of two prenylated 2-quinolones, compounds **2** and **3** which were confirmed by  $^{13}\text{C}$  NMR (Figure S10), COSY (Figure S11), HSQC (Figure S12) and HMBC (Figure S13) experiments. The  $^1\text{H}$  NMR spectrum (Table S1 & Table S2) displayed two olefinic protons at  $\delta$  5.20 (2H, t,  $J = 7.0$  Hz), two methylene groups at  $\delta$  3.34 and 3.33 (2H, d,  $J = 7.0$ , each), four methyls at  $\delta$  1.62 (6H s) and  $\delta$  1.75 (6H s), indicating the presence of two prenyl (dimethylallyl) groups in the compounds. The spectrum further revealed four adjacent aromatic protons at  $\delta$  7.76 dd ( $J = 8.0, 1.1$  Hz), 7.20 ddd ( $J = 8.6, 8.0, 1.4$  Hz), 7.48 ddd ( $J = (8.6, 8.4, 1.1$  Hz) and 7.30 d ( $J = 8.4$  Hz) comprising an ABCD ring system and three adjacent aromatic protons at  $\delta$  7.38 dd ( $J = 8.0, 1.2$  Hz), 7.09 dd ( $J = 8.0, 7.9$  Hz) and 6.97dd ( $J = 7.9, 1.2$  Hz) comprising an ABC ring system, suggesting a di- and tri-substituted benzene rings. In addition, the  $^1\text{H}$  NMR spectrum showed two *N*-methyl signals at  $\delta$  3.66 and 3.89 and three methoxy groups at  $\delta$  3.81, 3.82 and 3.85. The  $^{13}\text{C}$  NMR spectrum showed 35 carbons including two carbonyl carbons at  $\delta$  164.0 and 165.0 and three oxygenated unsaturated carbons at  $\delta$  160.2, 160.0 and 148.8. Position of the prenyl groups in the two compounds was confirmed at C-3 by an HMBC experiment as methylene at 1' showed  $^2J$  correlation to C-3 and  $^3J$  correlation to C-2 and C-4 (Table S1 & Table S2). Further, the *N*-methyl groups in both of the compounds showed  $^3J$  correlations to both C-2 (C=O) and C-9. All of the above data strongly suggested that ZRP-14 is a mixture of two prenylated *N*-methyl 2-quinolones. The methoxy group at  $\delta$  3.85 showed  $^3J$  correlation to C-4 (160.2) of the di-substituted benzene ring while the remaining two methoxy groups at  $\delta$  3.81 and 3.82 showed  $^3J$  correlations to C-4 ( $\delta$  160.0) and C-8 ( $\delta$  148.8) of the tri-substituted benzene ring. On the basis of above spectral data compound **2** and compound **3** were identified as 3-dimethylallyl-4-methoxy-1-methyl-2-quinolone or *N*-methyllatanine and 3-dimethylallyl-4,8-dimethoxy-1-methyl-2-quinolone respectively. These two compounds (compounds **2** & **3**) were isolated for the first time from the genus *Zanthoxylum*.

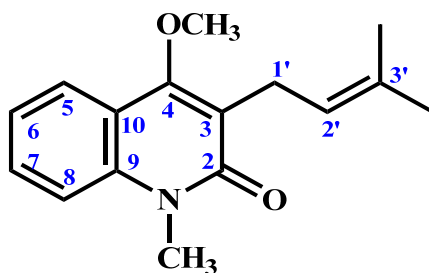*N*-methylatanineTable S1. NMR spectral data (CDCl<sub>3</sub>) for compound 2 (ZRP-14) [17].

| Position           | $\delta_{\text{H}}^{\text{a}}$       | $\delta_{\text{C}}^{\text{b}}$ | HSQC  | HMBC                                                     |
|--------------------|--------------------------------------|--------------------------------|-------|----------------------------------------------------------|
| 2                  | ---                                  | 164.0                          |       |                                                          |
| 3                  | ---                                  | 122.6                          |       |                                                          |
| 4                  | ---                                  | 160.2                          |       |                                                          |
| 5                  | 7.76 dd ( $J = 8.0, 1.1$ Hz)         | 123.4                          | 123.4 | 130.1 (C-7), 139.0 (C-9)                                 |
| 6                  | 7.20 ddd ( $J = 8.6, 8.0, 1.4$ Hz)   | 121.9                          | 121.9 | 122.4 (C-10)                                             |
| 7                  | 7.48 ddd ( $J = (8.6, 8.4, 1.1)$ Hz) | 130.1                          | 130.1 |                                                          |
| 8                  | 7.30 d ( $J = 8.4$ Hz)               | 114.1                          | 114.1 | 122.4 (C-10)                                             |
| 9                  | ---                                  | 139.0                          |       |                                                          |
| 10                 | ---                                  | 122.4                          |       |                                                          |
| 1'                 | 3.34 d (2H, $J = 7.0$ Hz)            | 24.3                           | 24.3  | 122.6 (C-3), 132.5 (C-3'),<br>160.0 (C-4), 165.0 (C-2)   |
| 2'                 | 5.20 t ( $J = 7.0$ Hz)               | 121.5                          | 121.5 |                                                          |
| 3'                 | ---                                  | 132.5                          |       |                                                          |
| Me-3' <i>cis</i>   | 1.62, 3H s                           | 25.7                           | 25.7  | 132.5 (C-3'), 122.6 (C-3), 19.0<br>(Me-3' <i>trans</i> ) |
| Me-3' <i>trans</i> | 1.75, 3H s                           | 19.0                           | 19.0  | 132.5 (C-3'), 122.6 (C-3),<br>25.7(Me-3' <i>cis</i> )    |
| N-Me               | 3.66, 3H s                           | 29.8                           | 29.8  | 139.0 (C-9), 164.0 (C-2)                                 |
| OMe-4              | 3.85, 3H s                           | 61.8                           | 61.8  | 160.2 (C-4)                                              |

<sup>a</sup> = measured in 400 MHz, <sup>b</sup> = measured in 100 MHz

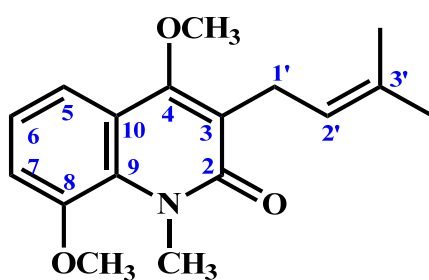

**3-dimethylallyl-4,8-dimethoxy-1-methyl-2-quinolone**

**Table S2. NMR spectral data (CDCl<sub>3</sub>) for compound 3 (ZRP-14) [17].**

| Position            | $\delta_{\text{H}}^{\text{a}}$ | $\delta_{\text{C}}^{\text{b}}$ | HSQC  | HMBC                                                 |
|---------------------|--------------------------------|--------------------------------|-------|------------------------------------------------------|
| 2                   | ---                            | 165.0                          |       |                                                      |
| 3                   | ---                            | 122.6                          |       |                                                      |
| 4                   | ---                            | 160.0                          |       |                                                      |
| 5                   | 7.38 dd( $J = 8.0, 1.2$ Hz)    | 116.0                          | 116.0 | 130.6 (C-9), 113.5 (C-7)                             |
| 6                   | 7.09 dd ( $J = 8.0, 7.9$ Hz)   | 122.7                          | 122.7 | 120.2 (C-10), 148.8 (C-8)                            |
| 7                   | 6.97 dd ( $J = 7.9, 1.2$ Hz)   | 113.5                          | 113.5 | 130.6 (C-9), 116.0 (C-5)                             |
| 8                   | ---                            | 148.8                          |       |                                                      |
| 9                   | ---                            | 130.4                          |       |                                                      |
| 10                  | ---                            | 120.2                          |       |                                                      |
| 1'                  | 3.33 d (2H, $J = 7.0$ Hz)      | 24.4                           | 24.4  | 122.6 (C-3), 132.5(C-3'), 160.0 (C-4), 165.0 (C-2)   |
| 2'                  | 5.20 t ( $J = 7.0$ Hz)         | 121.5                          | 121.5 |                                                      |
| 3'                  | ---                            | 132.5                          |       |                                                      |
| Me -3' <i>cis</i>   | 1.62, 3H s                     | 25.7                           | 25.7  | 132.5 (C-3'), 122.6(C-3), 19.0 (Me-3' <i>trans</i> ) |
| Me-3' <i>trans</i>  | 1.75, 3H s                     | 19.0                           | 19.0  | 132.5 (C-3') , 122.6 (C-3), 25.7(Me-3' <i>cis</i> )  |
| N-Me                | 3.89, 3H s                     | 35.5                           | 35.5  | 130.4 (C-7), 165.0 (C-2)                             |
| OCH <sub>3</sub> -4 | 3.81, 3H s                     | 61.6                           | 61.6  | 160.0 (C-4)                                          |
| OCH <sub>3</sub> -8 | 3.82, 3H s                     | 56.7                           | 56.7  | 148.8 (C-8)                                          |

<sup>a</sup>= measured in 400 MHz, b= measured in 100 MHz

**Figure S9.**  $^1\text{H}$  NMR (400 MHz,  $\text{CDCl}_3$ ) spectrum of compound **2** and **3** (ZRP-14).

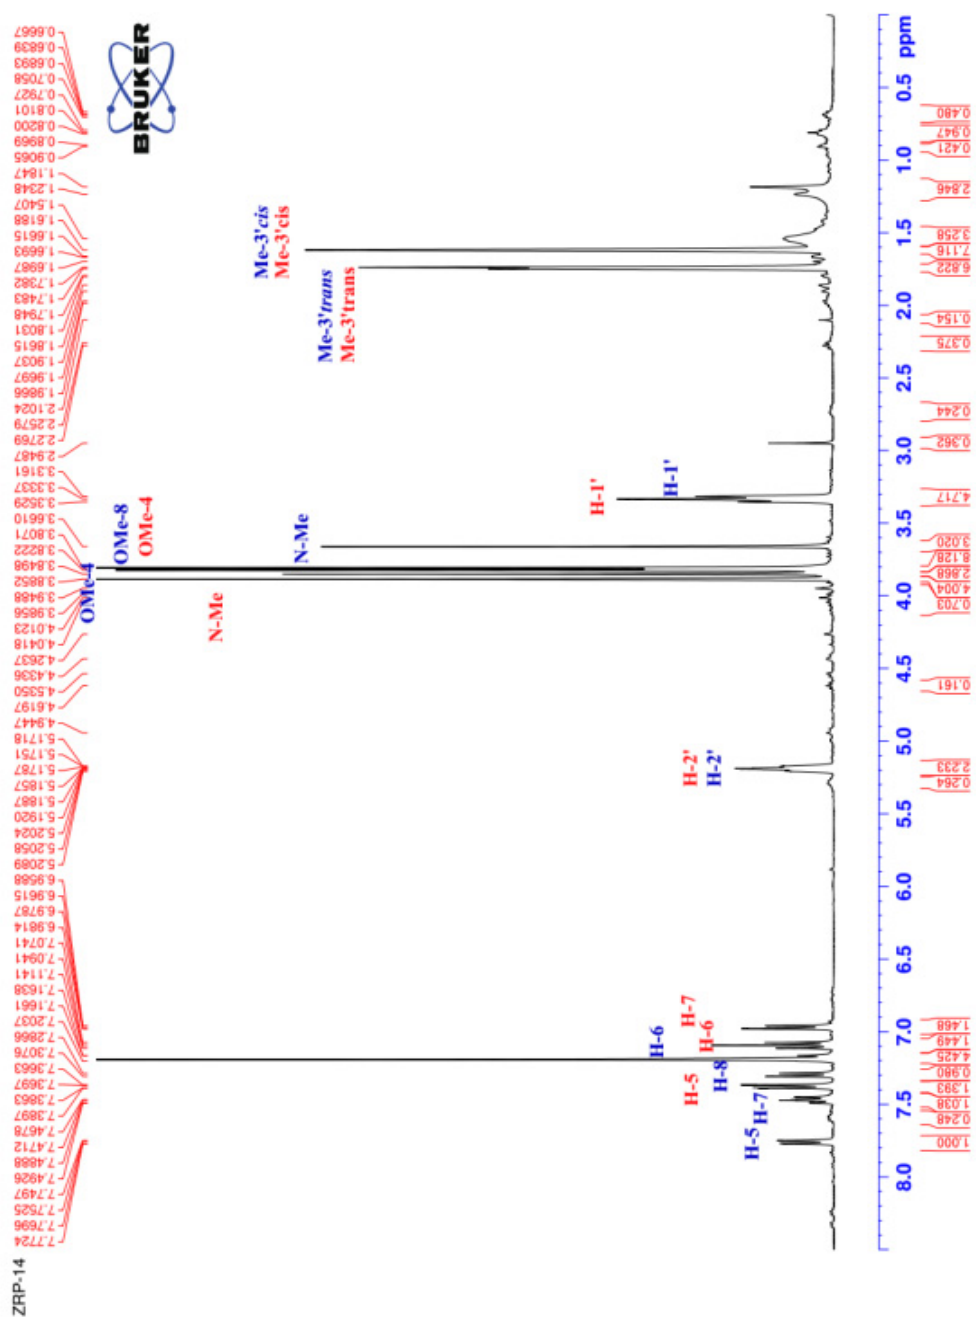



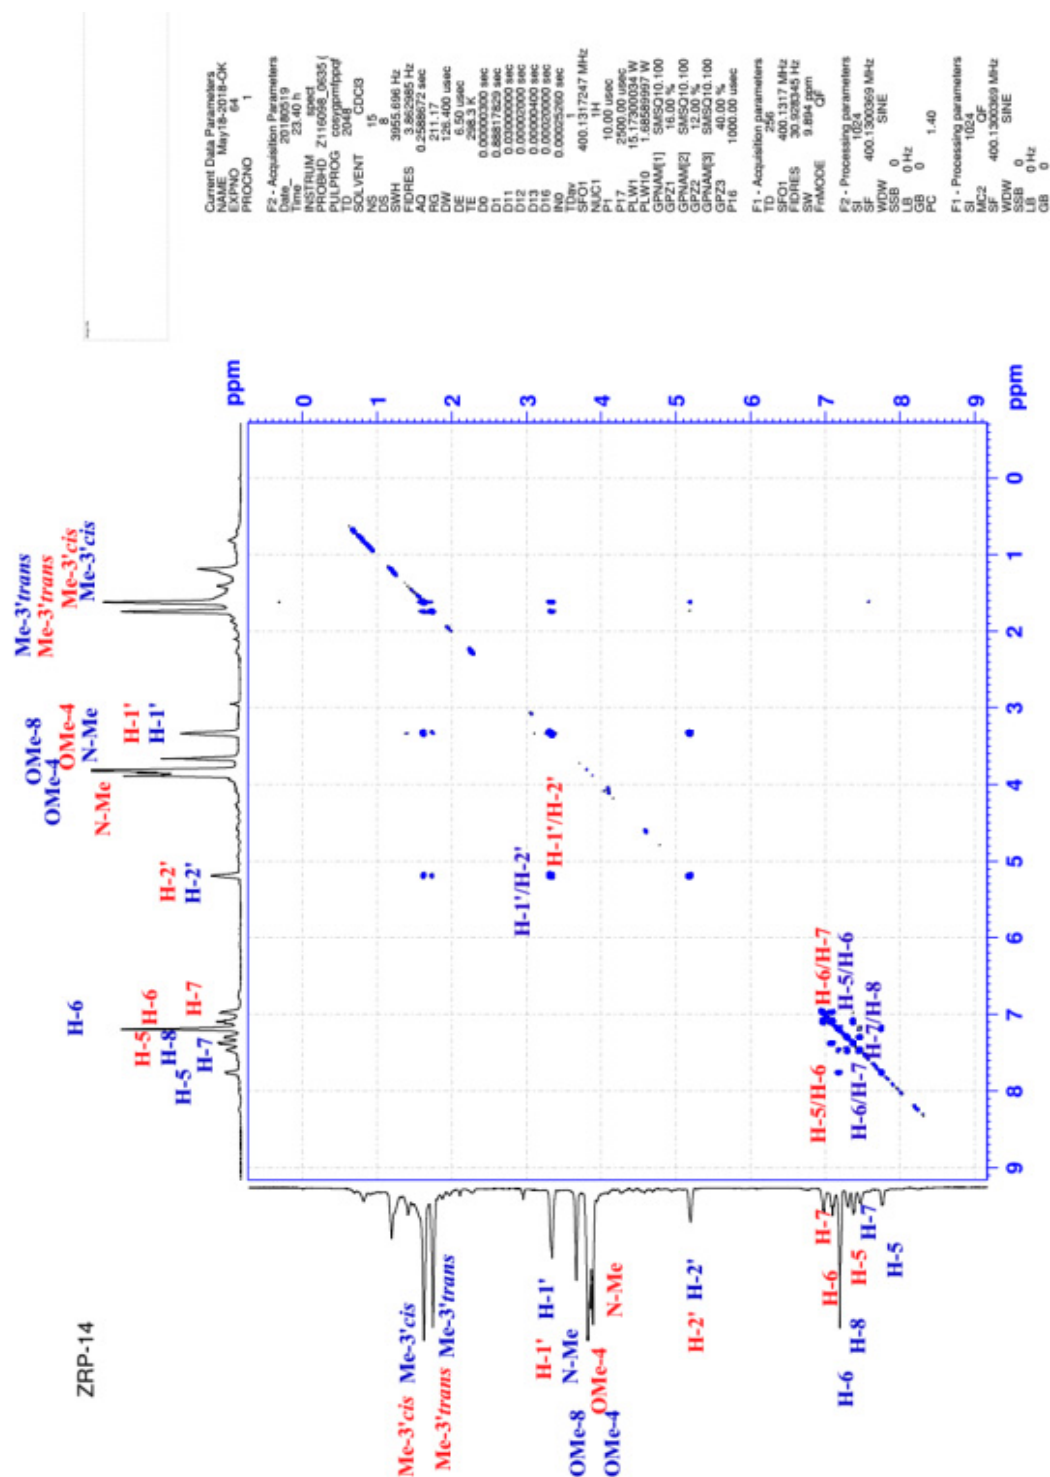Figure S11. COSY (400 MHz, CDCl<sub>3</sub>) spectrum of compound 2 and 3 (ZRP-14)





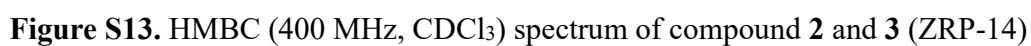

### Characterization of compound 4 (ZRC-7) as 8-O-demethylchelerythrine

Compound 4, isolated as yellow mass, showed dark quenching spot under UV light at 254 nm on a TLC plate and gave yellow color when sprayed with vanillin-sulfuric acid reagent followed by heating at 110 °C for 2 minutes.

The  $^1\text{H}$  NMR spectrum (Table S3, Figure S14) of this compound displayed two sets of ortho-coupling doublets at  $\delta$  7.99 ( $J = 9.0$  Hz), 8.67 ( $J = 9.0$  Hz), 8.67 ( $J = 9.0$  Hz) and 8.24 ( $J = 9.0$  Hz) and two singlets at  $\delta$  7.58 and 8.31 attributable to H-9, H-10, H-11, H-12, H-1 and H-4 respectively. In addition, the spectrum showed one methoxy group at  $\delta$  4.28, an N-methyl at  $\delta$  5.50 and a methylenedioxy group at  $\delta$  6.29. A highly deshielded proton at  $\delta$  9.71 could be assigned to H-6, the deshielded effect may be due to presence of neighbouring nitrogen atom. On the basis of above data compound 4 was identified as 8-O-demethylchelerythrine. The  $^1\text{H}$  NMR data were formed similar to those reported in the literature [18]. 8-O-demethylchelerythrine is reported for the first time from *Z. rhetsa*.

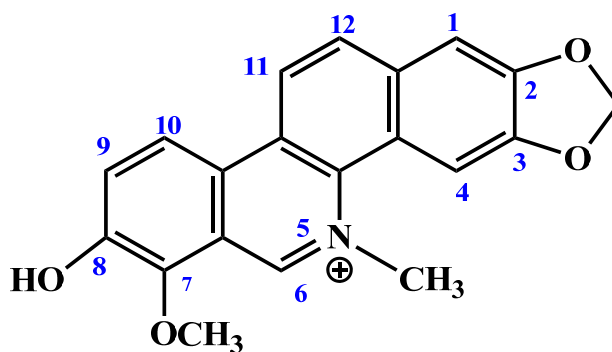

8-O-demethylchelerythrine

**Table S3. <sup>1</sup>H NMR spectral data (400 MHz, CD<sub>3</sub>OD) for compound 9 (ZRC-7)**

|                      | Compound 9             | 8-O-demethylchelerythrine*[18] |
|----------------------|------------------------|--------------------------------|
| Position             | $\delta_{\text{H}}$    | $\delta_{\text{H}}$            |
| 1                    | 7.58 s                 | 7.50 s                         |
| 4                    | 8.31 s                 | 7.94 s                         |
| 6                    | 9.71 s                 | 9.69 s                         |
| 9                    | 7.99 d ( $J = 9.0$ Hz) | 8.05 d ( $J = 9.1$ Hz)         |
| 10                   | 8.67 d ( $J = 9.0$ Hz) | 8.50 d ( $J = 9.1$ Hz)         |
| 11                   | 8.67 d ( $J = 9.0$ Hz) | 8.50 d ( $J = 9.1$ Hz)         |
| 12                   | 8.24 d ( $J = 9.0$ Hz) | 8.19 d ( $J = 9.1$ Hz)         |
| OMe-7                | 4.28 3H s              | 4.25 3H, s                     |
| N-Me                 | 5.51 3H s              | 5.00 3H, s                     |
| -OCH <sub>2</sub> O- | 6.29 2H s              | 6.21 2H, s                     |

\* = spectrum recorded in CDCl<sub>3</sub>-TFA

NMR spectrum of compound 4 characterized as 8-O-demethylchelerythrine:

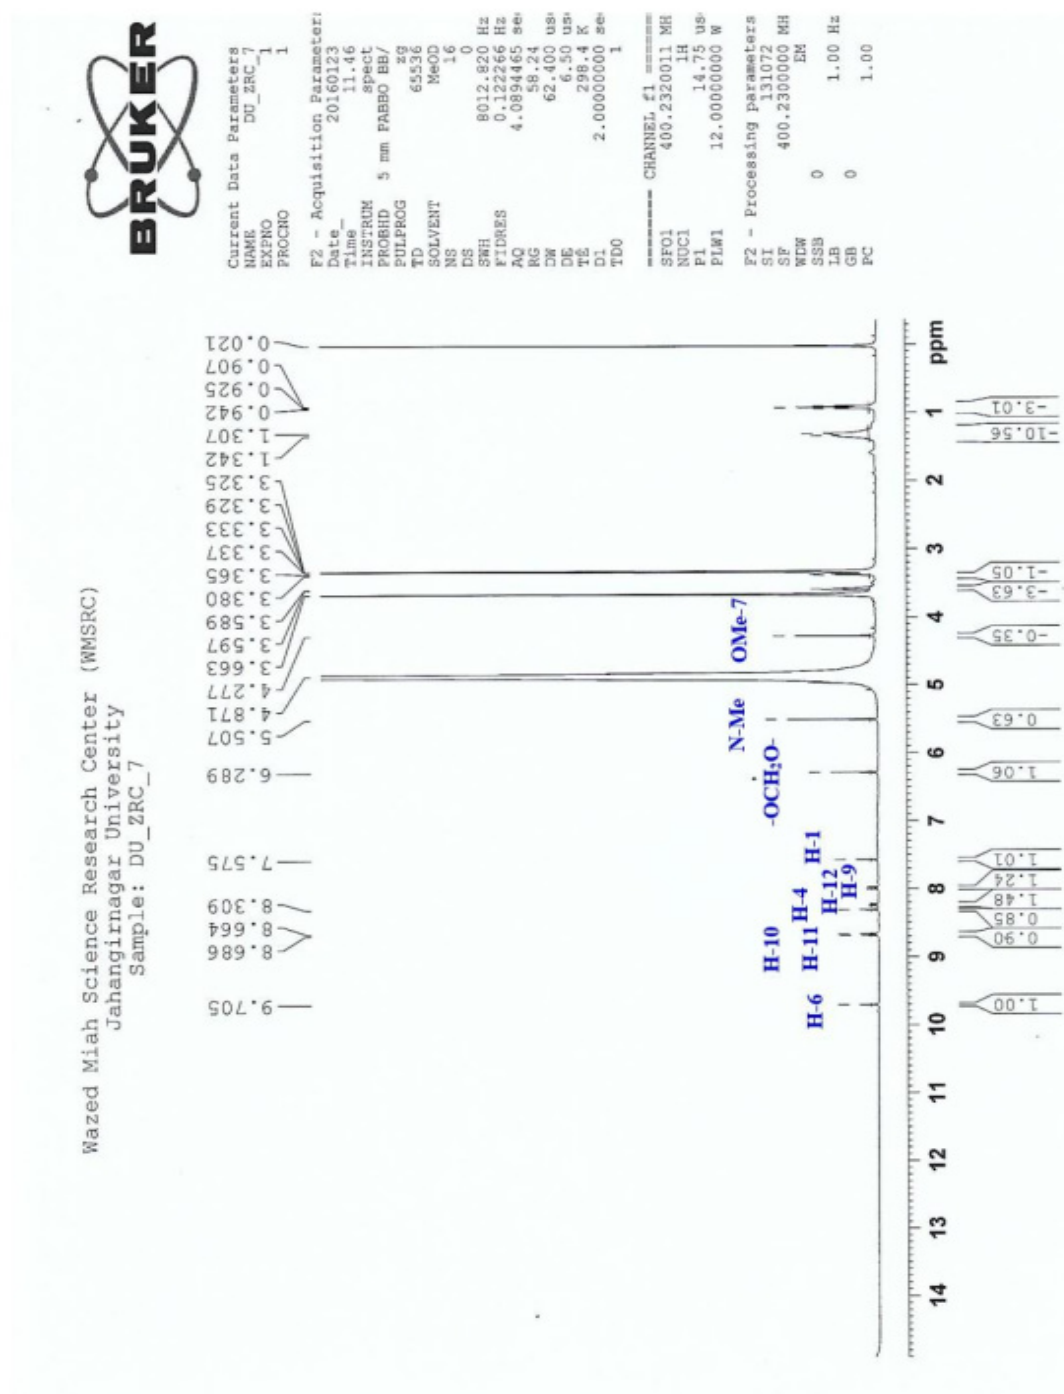

Figure S14  $^1\text{H}$  NMR (400 MHz,  $\text{CDCl}_3$ ) spectrum of compound 4 (ZRC-7)

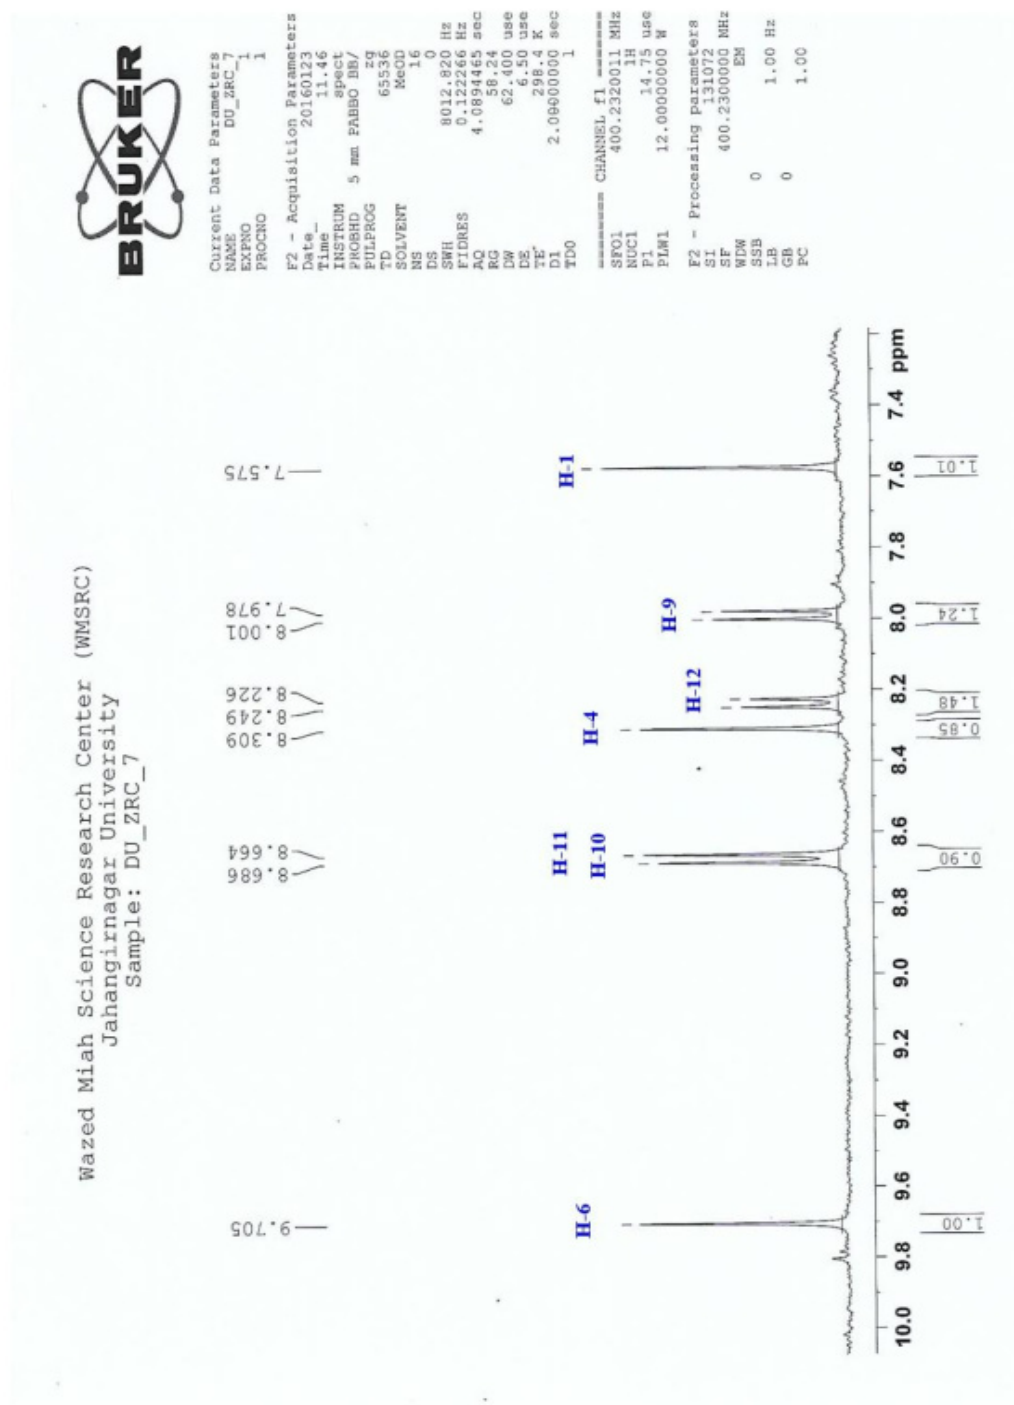

**Figure S15** partially expanded  $^1\text{H}$  NMR (400 MHz,  $\text{CDCl}_3$ ) spectrum of compound **4** (ZRC-7)



### Characterization of compound 5 and 6 (ZRC-79) as mixture of chelerythrine and 7-methoxynitidine

ZRC-79, isolated as yellow mass, presented a deep yellow fluorescent spot at 366 nm UV light on a TLC plate and produced reddish brown color with Dragendorff's reagent.

The  $^1\text{H}$  NMR spectrum (400 MHz,  $\text{CDCl}_3$ ; Table S4; Figure S16) of ZRC-79 indicated the presence of two compounds in 2:1 ratio. The major signals include two pairs of ortho coupling doublets at  $\delta$  7.85, 8.34, 8.32 and 7.98, two aromatic proton singlets at  $\delta$  7.32 & 8.02, two methoxy groups at  $\delta$  4.41 and 4.04, a methylenedioxy group at  $\delta$  6.18 (2H, s), a very deshielded singlet at  $\delta$  10.72 and an N-methyl group resonating at  $\delta$  5.27 (3H, s). All these  $^1\text{H}$  NMR signals were found identical to those reported for chelerythrine [19].

The rest of the  $^1\text{H}$  NMR signals (minor compound) (Table S5) include two ortho-coupling doublets at  $\delta$  8.23 and 7.85, three aromatic proton singlets at  $\delta$  7.82, 8.04 and 8.42, three methoxy groups at  $\delta$  4.41, 4.04 and 3.88, a methylenedioxy group at  $\delta$  6.22 (2H, s), a deshielded proton singlet at  $\delta$  10.72 and an N-methyl at  $\delta$  5.24 (3H, s). All these latter signals indicated the minor compound similar to chelerythrine (major one) but with additional methoxy group instead of the proton at C-9. Thus ZRC-79 was identified as a mixture of chelerythrine (compound 5) and 7-methoxynitidine, (compound 6). 7-methoxynitidine is a previously undescribed naturally occurring benzophenanthredine alkaloid, however, it was synthesized by Ishii et al in 1985 [20].

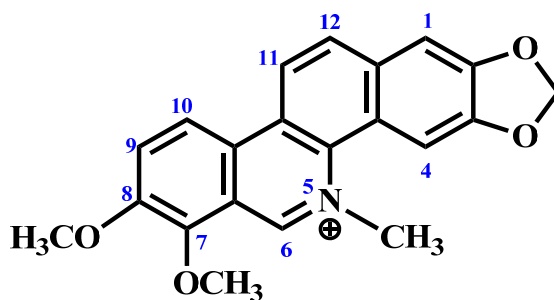

Chelerythrine

**Table S4. <sup>1</sup>H NMR spectral data (400 MHz, CDCl<sub>3</sub>) for compound 5 (ZRC-79)**

|                      | Compound 5             | Chelerythrine [19]     |
|----------------------|------------------------|------------------------|
| Position             | $\delta_{\text{H}}$    | $\delta_{\text{H}}$    |
| 1                    | 7.32 s                 | 7.49 s                 |
| 4                    | 8.02 s                 | 8.08 s                 |
| 6                    | 10.72 s                | 9.92 s                 |
| 9                    | 7.85 d ( $J = 9.0$ Hz) | 8.01 d ( $J = 9.0$ Hz) |
| 10                   | 8.34 d ( $J = 9.0$ Hz) | 8.60 d ( $J = 9.0$ Hz) |
| 11                   | 8.32 d ( $J = 9.0$ Hz) | 8.56 d ( $J = 9.0$ Hz) |
| 12                   | 7.98 d ( $J = 9.0$ Hz) | 8.10 d ( $J = 9.0$ Hz) |
| OMe-7                | 4.41 3H s              | 4.27 3H s              |
| OMe-8                | 4.04 3H s              | 4.12 3H s              |
| N-Me                 | 5.27 3H s              | 4.97 3H s              |
| -OCH <sub>2</sub> O- | 6.18 2H s              | 6.26 2H s              |

\*= spectrum recorded in CD<sub>3</sub>OD

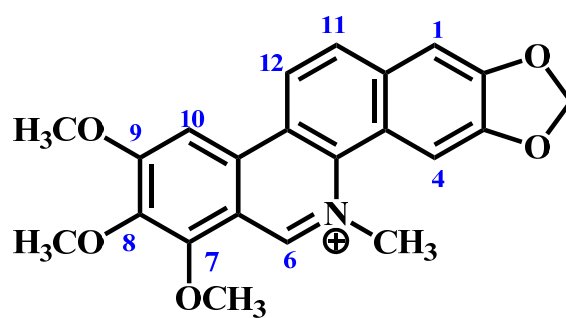

7-methoxynitidine

Table S5.  $^1\text{H}$  NMR spectral data (400 MHz,  $\text{CDCl}_3$ ) for compound 6 (ZRC-79)

| Position             | $\delta_{\text{H}}$    |
|----------------------|------------------------|
| 1                    | 7.82 s                 |
| 4                    | 8.04 s                 |
| 6                    | 10.72 s                |
| 10                   | 8.42 s                 |
| 11                   | 8.23 d ( $J = 9.0$ Hz) |
| 12                   | 7.85 d ( $J = 9.0$ Hz) |
| OMe-7                | 4.41 3H s              |
| OMe-8                | 4.04 3H s              |
| OMe-9                | 3.88 3H s              |
| N-Me                 | 5.24 3H s              |
| -OCH <sub>2</sub> O- | 6.22 2H s              |

NMR spectrum of compound 5 and 6 characterized as a mixture of chelerythrine and 7-methoxynitidine:

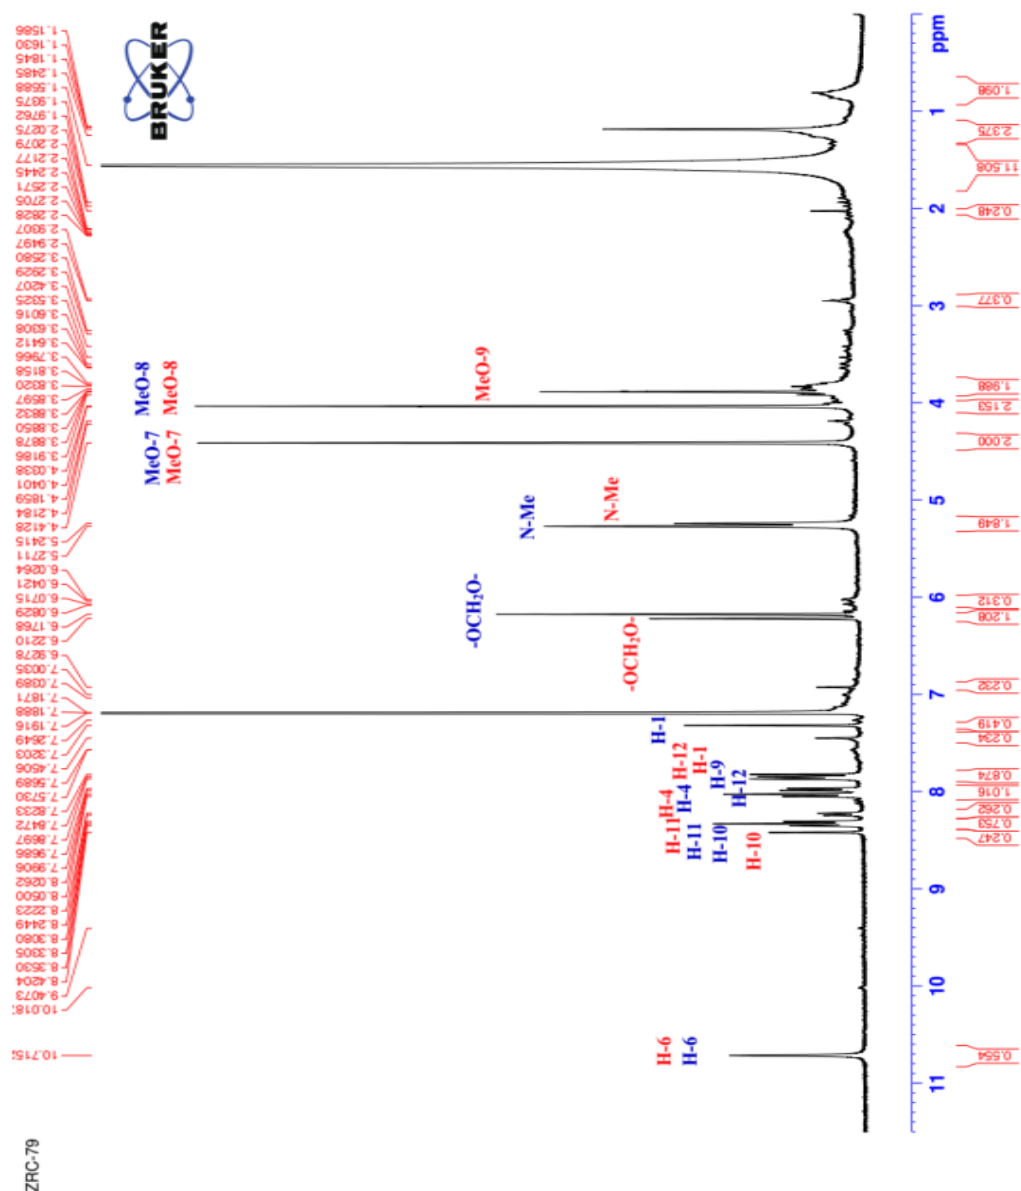

**Figure S16.**  $^1\text{H}$  NMR (400 MHz,  $\text{CDCl}_3$ ) spectrum of compound 5 & 6 (ZRC-79)

### Characterization of compound 7 (ZRC-35) as canthin-6-one

Compound 7, isolated as colorless crystals, provided blue fluorescent spot on a TLC plate at 366 nm UV light. The  $^1\text{H}$  NMR spectral (400 MHz,  $\text{CDCl}_3$ ; Table S6, Figure S17) data of compound 7 demonstrated the presence of four aromatic protons at  $\delta$  8.17 (d,  $J = 8.0$  Hz), 7.59 (dd,  $J = 8.0, 7.5$  Hz), 7.81 (dd,  $J = 8.4, 7.5$  Hz) and 8.65 (d,  $J = 8.4$  Hz) suggesting a disubstituted benzene ring and could be assigned to H-8, H-9, H-10 and H-11 respectively. Two ortho coupled aromatic protons resonating at  $\delta$  8.20 (d,  $J = 5.9$  Hz) and  $\delta$  8.73 (d,  $J = 5.9$  Hz) were attributable to H-1 and H-2 respectively. Another set of doublets at  $\delta$  8.49 ( $J = 10$  Hz) and  $\delta$  7.09 ( $J = 10$  Hz) were attributable to H-4 and H-5 of the conjugated lactam ring of canthin-6-one. The structure of compound 7 was identified as canthin-6-one by comparing its spectroscopic data with those published for the compound [21].

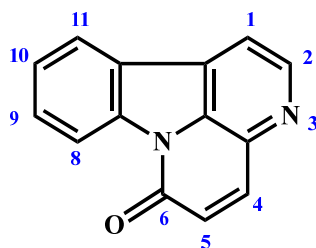

Canthin-6-one

Table S6 NMR spectral data (400 MHz;  $\text{CDCl}_3$ ) for compound 7 (ZRC-35)

| Position | Compound 7                   | Canthin-6-one [21]     |
|----------|------------------------------|------------------------|
|          | $\delta_{\text{H}}$          | $\delta_{\text{H}}$    |
| 1        | 8.20 d ( $J = 5.9$ Hz)       | 8.35 d ( $J = 4.8$ Hz) |
| 2        | 8.73 d ( $J = 5.9$ Hz)       | 8.86 d ( $J = 4.8$ Hz) |
| 4        | 8.49 d ( $J = 10$ Hz)        | 8.7 d ( $J = 9.7$ Hz)  |
| 5        | 7.09 d ( $J = 10$ Hz)        | 7.02 d ( $J = 9.7$ Hz) |
| 8        | 8.17 d ( $J = 8.0$ Hz)       | 8.55 d ( $J = 8.1$ Hz) |
| 9        | 7.59 dd ( $J = 8.0, 7.5$ Hz) | 7.79 t ( $J = 7.6$ Hz) |
| 10       | 7.81 dd ( $J = 8.4, 7.5$ Hz) | 7.62 t ( $J = 7.6$ Hz) |
| 11       | 8.65 d ( $J = 8.4$ Hz)       | 8.42 d ( $J = 7.8$ Hz) |

NMR spectrum of compound 7 characterized as canthin-6-one:

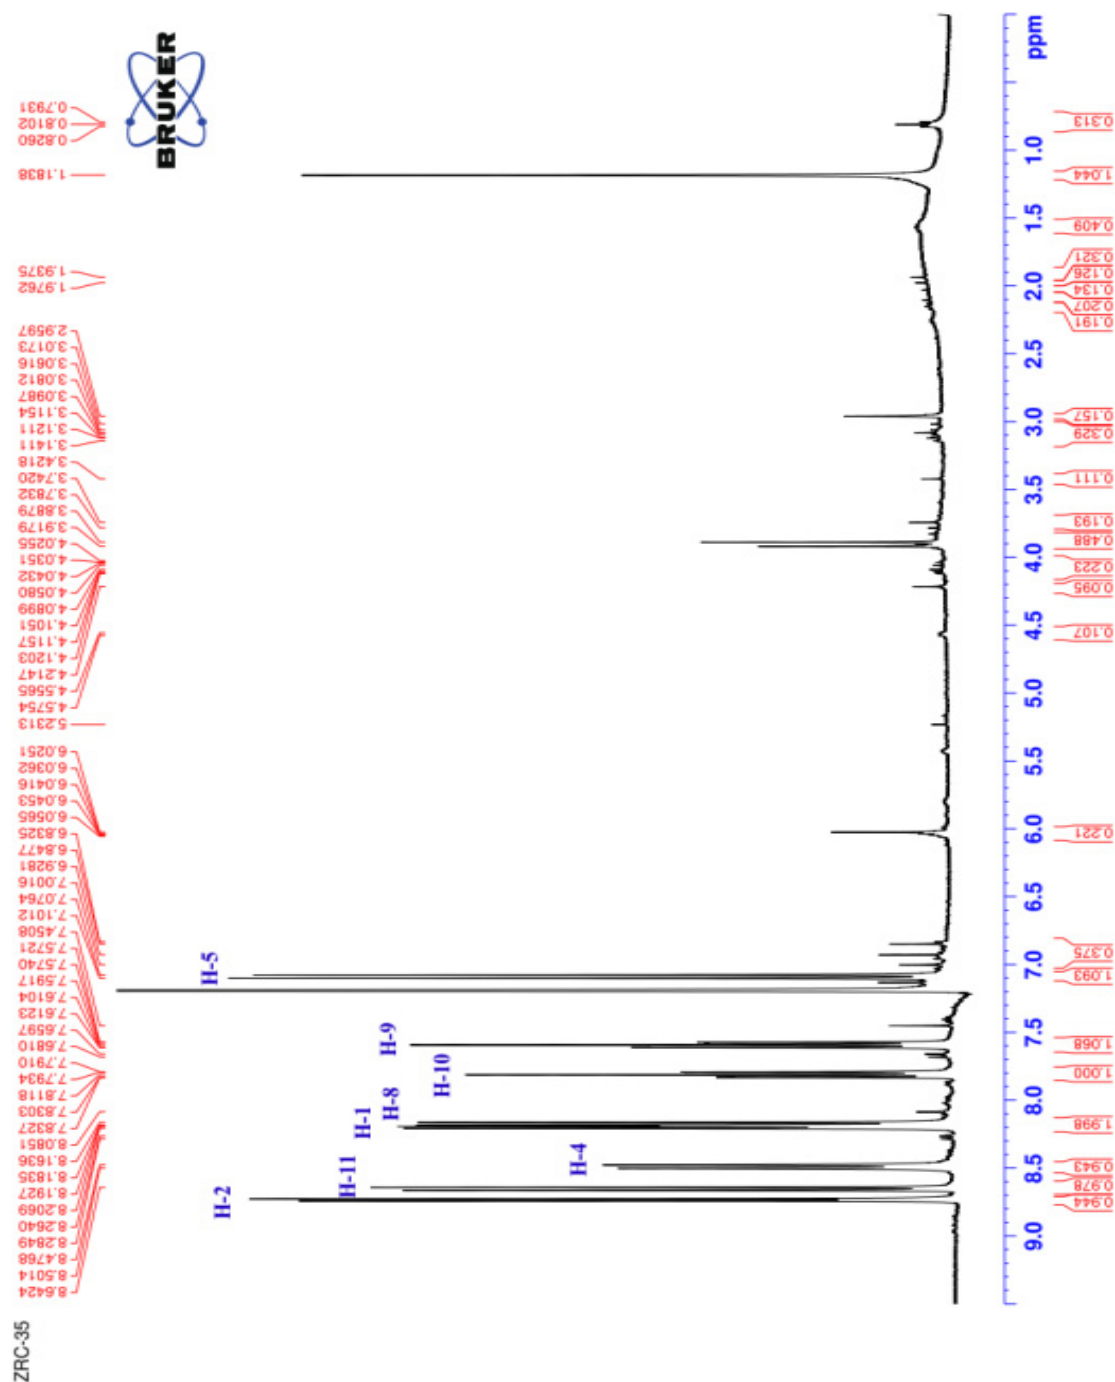

Figure S17  $^1\text{H}$  NMR (400 MHz,  $\text{CDCl}_3$ ) spectrum of compound 7 (ZRC-35)



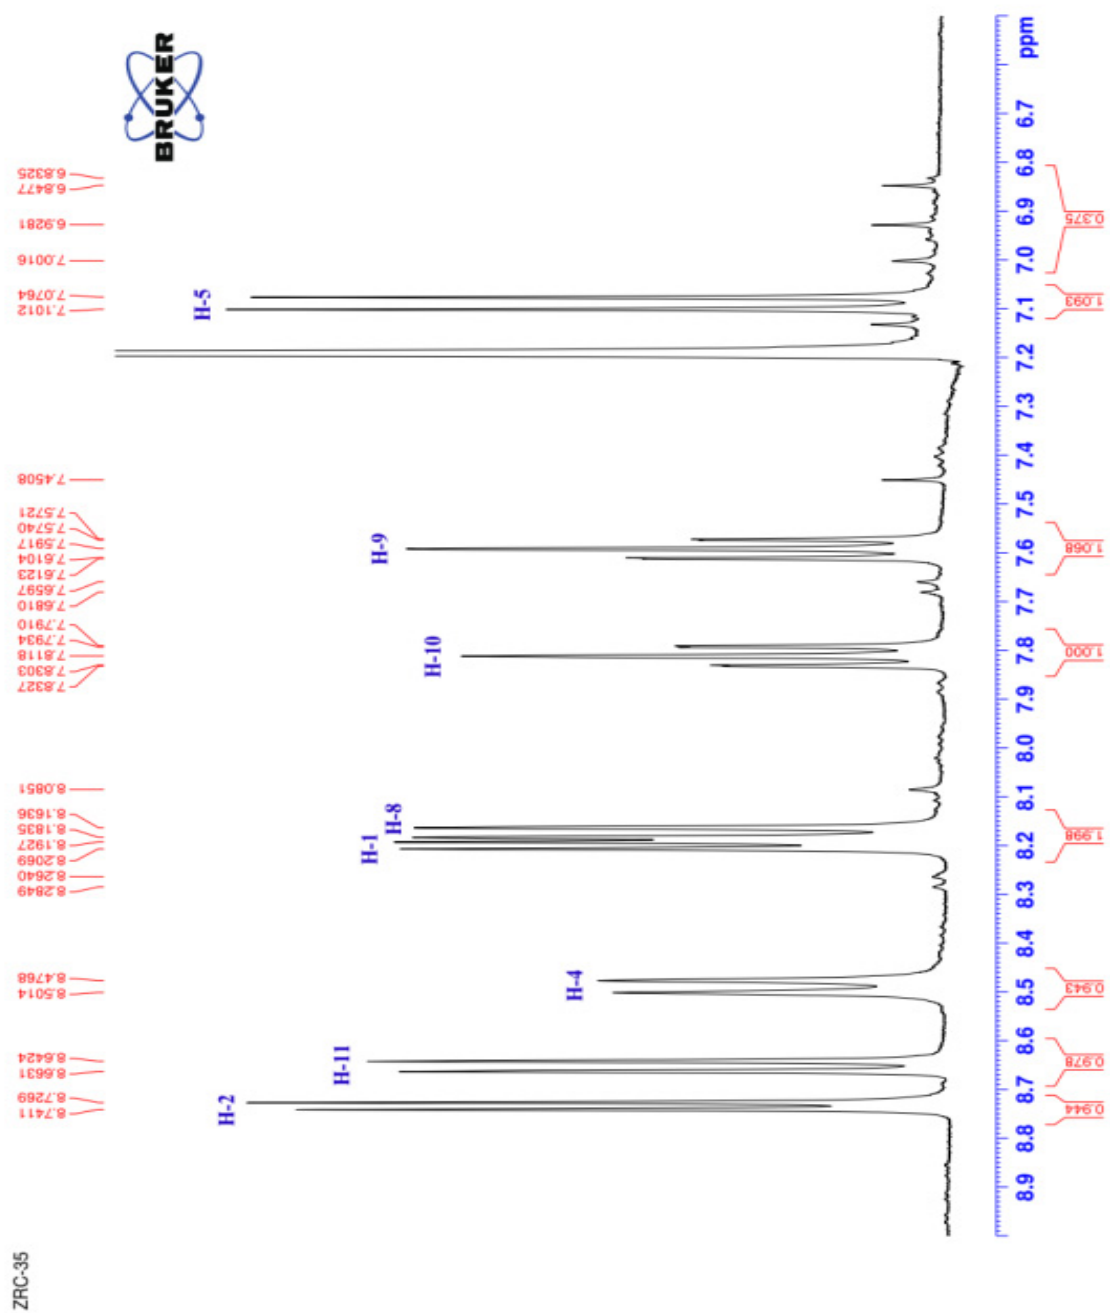

**Figure S18** Partially expanded <sup>1</sup>H NMR (400 MHz, CDCl<sub>3</sub>) spectrum of compound 7 (ZRC-35)

**Characterization of compound 8 [ZRP-14(2)] as (+)-piperitol- $\gamma$ - $\gamma$ - dimethylallylether**

Compound **15**, isolated as a yellow mass, showed blue fluorescence at 366 nm UV light on a TLC plate and produced no colour after spraying with vanillin-sulfuric acid reagent.

The  $^1\text{H}$  NMR spectrum (400 MHz,  $\text{CDCl}_3$ ; Table S7, Figure S19) of compound **15** displayed six aromatic protons at  $\delta$  6.97, 6.71, 6.76, 6.83, 6.74 and 6.76, the coupling constant of which indicated two trisubstituted benzene rings. A two proton singlet at  $\delta$  5.88 and three proton singlet at  $\delta$  3.80 indicating respectively a methylenedioxy and a methoxy groups. An oxymethylene group at  $\delta$  4.50 (2H, d,  $J = 9.6$  Hz), an olefinic proton  $\delta$  5.44 (1H, brt,  $J = 6.0$  Hz) and two methyls at  $\delta$  1.69 and 1.65 indicated the presence of a 3-methyl-but-2-enyloxy (prenyloxy) chain in the molecule. In addition the spectrum showed eight olefinic protons at  $\delta$  3.09 to 4.44, suggesting a lignan with a furofuran ring. The  $^{13}\text{C}$  NMR spectrum (100 MHz,  $\text{CDCl}_3$ ; Table S7, Figure S20) showed twenty-four carbons including a methylenedioxy carbon at  $\delta$  101.1, a methoxy carbon at  $\delta$  56.0 and five carbinol carbon at  $\delta$  85.9, 85.8, 71.7, 71.7 and 65.8. A methylenedioxy group at  $\delta$  5.88 with three aromatic protons suggested the presence of a 3, 4-methylenedioxyphenyl (i.e piperonyl) group. The rest three aromatic protons, together with the 3-methyl-but-2-enyloxy (prenyloxy) and the methoxy group indicated the presence of a 3-methoxy-4-prenyloxyphenyl group. The HSQC (Figure S21) and HMBC (Figure S22) experiment allowed assignment of all the protons and carbons in the molecule. All these data enabled the identity of ZRP-14(2) as a furofuran lignan with a piperonyl group and a 3-methoxy-4-prenyloxy group. On the basis of above spectral data, compound **8** was identified as (+)-piperitol- $\gamma$ - $\gamma$ - dimethylallylether.

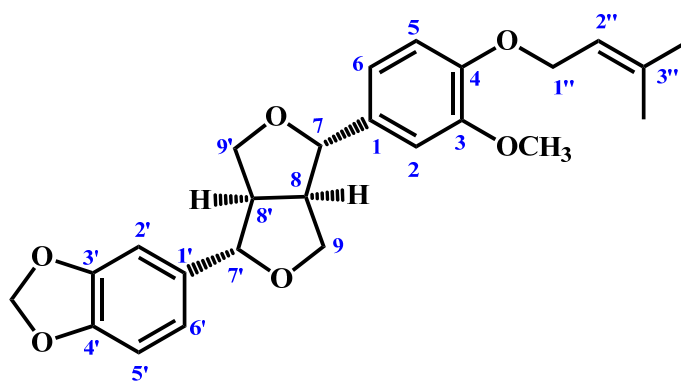

**(+)- Piperitol- $\gamma$ - $\gamma$ -dimethylallylether**

**Table S7. NMR spectral data (CDCl<sub>3</sub>) for compound 8 [ZRP-14(2)]**

| Position                  | $\delta_{\text{H}}^{\text{a}}$ | $\delta_{\text{C}}^{\text{b}}$ | HSQC  | HMBC                                                      |
|---------------------------|--------------------------------|--------------------------------|-------|-----------------------------------------------------------|
| 1                         |                                | 135.1                          |       |                                                           |
| 2                         | 6.97 d ( $J = 1.2$ Hz)         | 106.5                          | 108.4 | 148.0 (C-4)                                               |
| 3                         |                                | 147.9                          |       |                                                           |
| 4                         |                                | 148.0                          |       |                                                           |
| 5                         | 6.71 d ( $J = 7.0, 9.0$ Hz)    | 112.9                          | 114.2 | 135.1 (C-1)                                               |
| 6                         | 6.76 dd ( $J = 8.0, 2.0$ Hz)   | 119.4                          | 118.4 |                                                           |
| 7                         | 4.66 d ( $J = 5.2$ Hz)         | 85.8                           | 82.1  | 71.7 (C-9), 71.7 (C-9')                                   |
| 8                         | 3.09 m                         | 54.4                           | 50.2  |                                                           |
| 9 $\alpha$                | 4.25 dd ( $J = 9.6, 6.0$ Hz)   | 71.7                           | 69.8  | 85.8 (C-7), 85.9 (C-7')                                   |
| 9 $\beta$                 | 3.94 m                         |                                |       | 85.8 (C-7), 85.9 (C-7')                                   |
| 1'                        |                                | 133.5                          |       |                                                           |
| 2'                        | 6.83br s                       | 109.4                          | 106.5 | 149.8 (C-4')                                              |
| 3'                        |                                | 147.1                          |       |                                                           |
| 4'                        |                                | 149.8                          |       |                                                           |
| 5'                        | 6.74 d ( $J = 8.8$ Hz)         | 108.2                          | 108.2 | 133.5 (C-1')                                              |
| 6'                        | 6.76 d ( $J = 8.0$ Hz)         | 118.2                          | 119.5 |                                                           |
| 7'                        | 4.44 d ( $J = 4$ Hz)           | 85.9                           | 87.7  | 71.7 (C-9), 71.7 (C-9')                                   |
| 8'                        | 3.09 m                         | 54.1                           | 54.6  |                                                           |
| 9' $\alpha$               | 4.25 dd ( $J = 9.6, 6.0$ Hz)   | 71.7                           |       | 85.8 (C-7), 85.9 (C-7')                                   |
| 9' $\beta$                | 3.94 m                         |                                |       | 85.8 (C-7), 85.9 (C-7')                                   |
| OMe-3                     | 3.80 3H s                      | 56.0                           | 56.0  | 147.9 (C-3)                                               |
| 3',4'-OCH <sub>2</sub> O- | 5.88 2H s                      | 101.1                          | 101.0 | 147.1 (C-3'), 149.8 (C-4')                                |
| 1''                       | 4.50 ( $J = 9.6$ Hz)           | 65.8                           |       | 120.0 (C-2''), 137.6 (C-3'')                              |
| 2''                       | 5.44 ( $J = 6$ Hz)             | 120.0                          |       |                                                           |
| 3''                       |                                | 137.6                          |       |                                                           |
| Me-3'' <i>cis</i>         | 1.69 3H s                      | 25.8                           |       | 18.2 (Me-3'' <i>trans</i> ), 120.0 (C-2''), 137.6 (C-3'') |
| Me-3'' <i>trans</i>       | 1.65 3H s                      | 18.2                           |       | 25.8 (Me-3'' <i>cis</i> ), 120.0 (C-2''), 137.6 (C-3'')   |

<sup>a</sup> = measured in 400 MHz, <sup>b</sup> = measured in 100 MHz

NMR spectrum of compound **8** as (+)-piperitol- $\gamma$ - $\gamma$ -dimethylallylether:

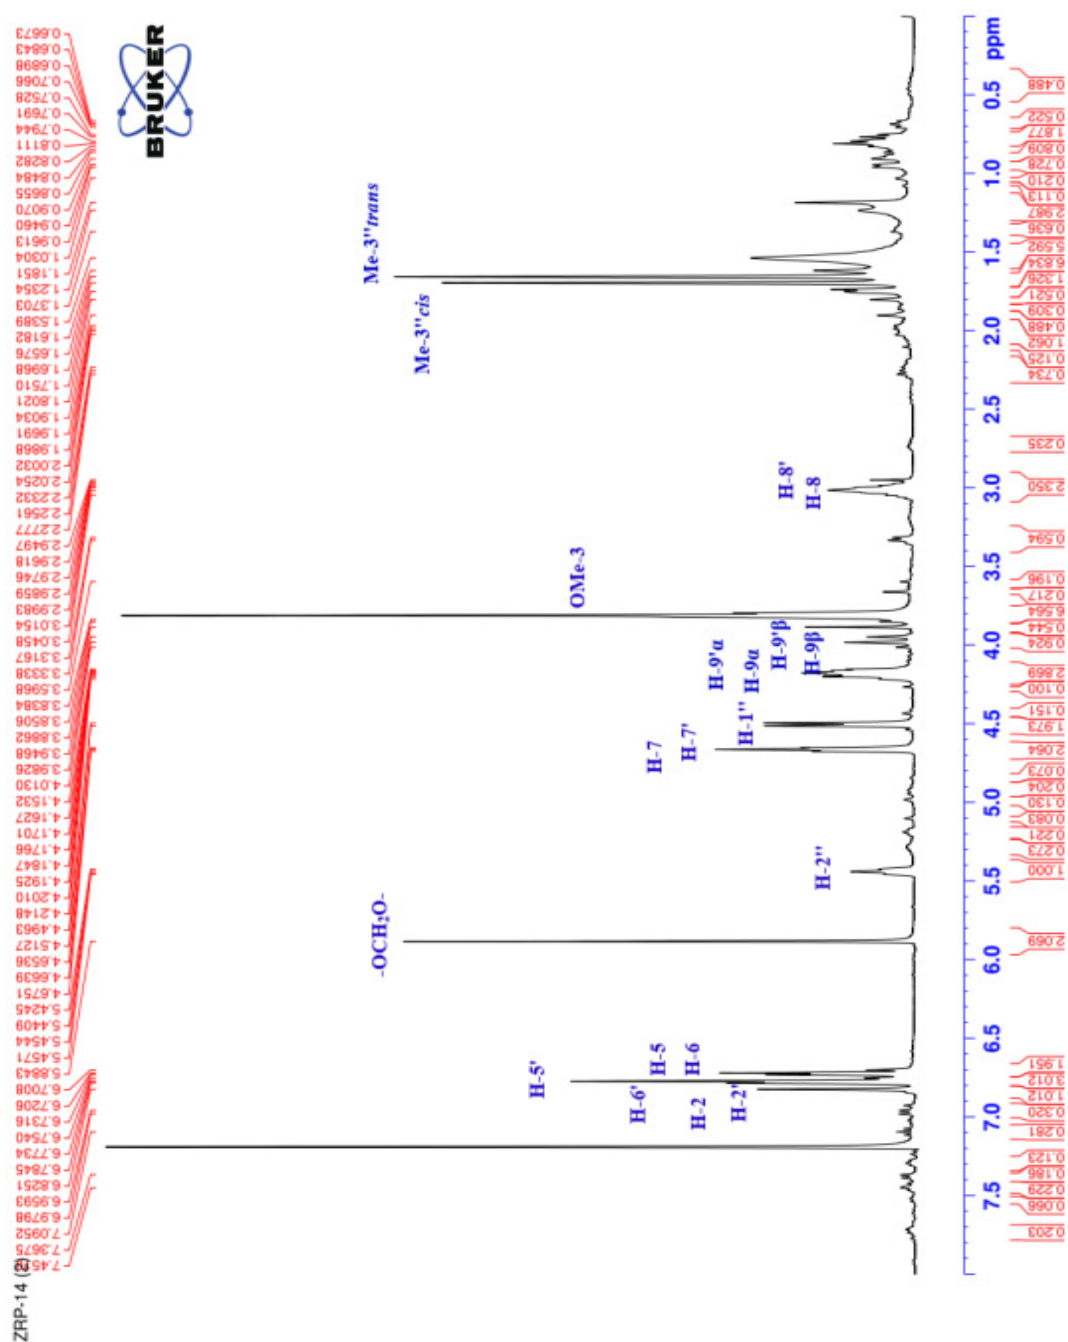

**Figure S19.**  $^1\text{H}$  NMR (400 MHz,  $\text{CDCl}_3$ ) spectrum of compound **8** [ZRC-14 (2)]



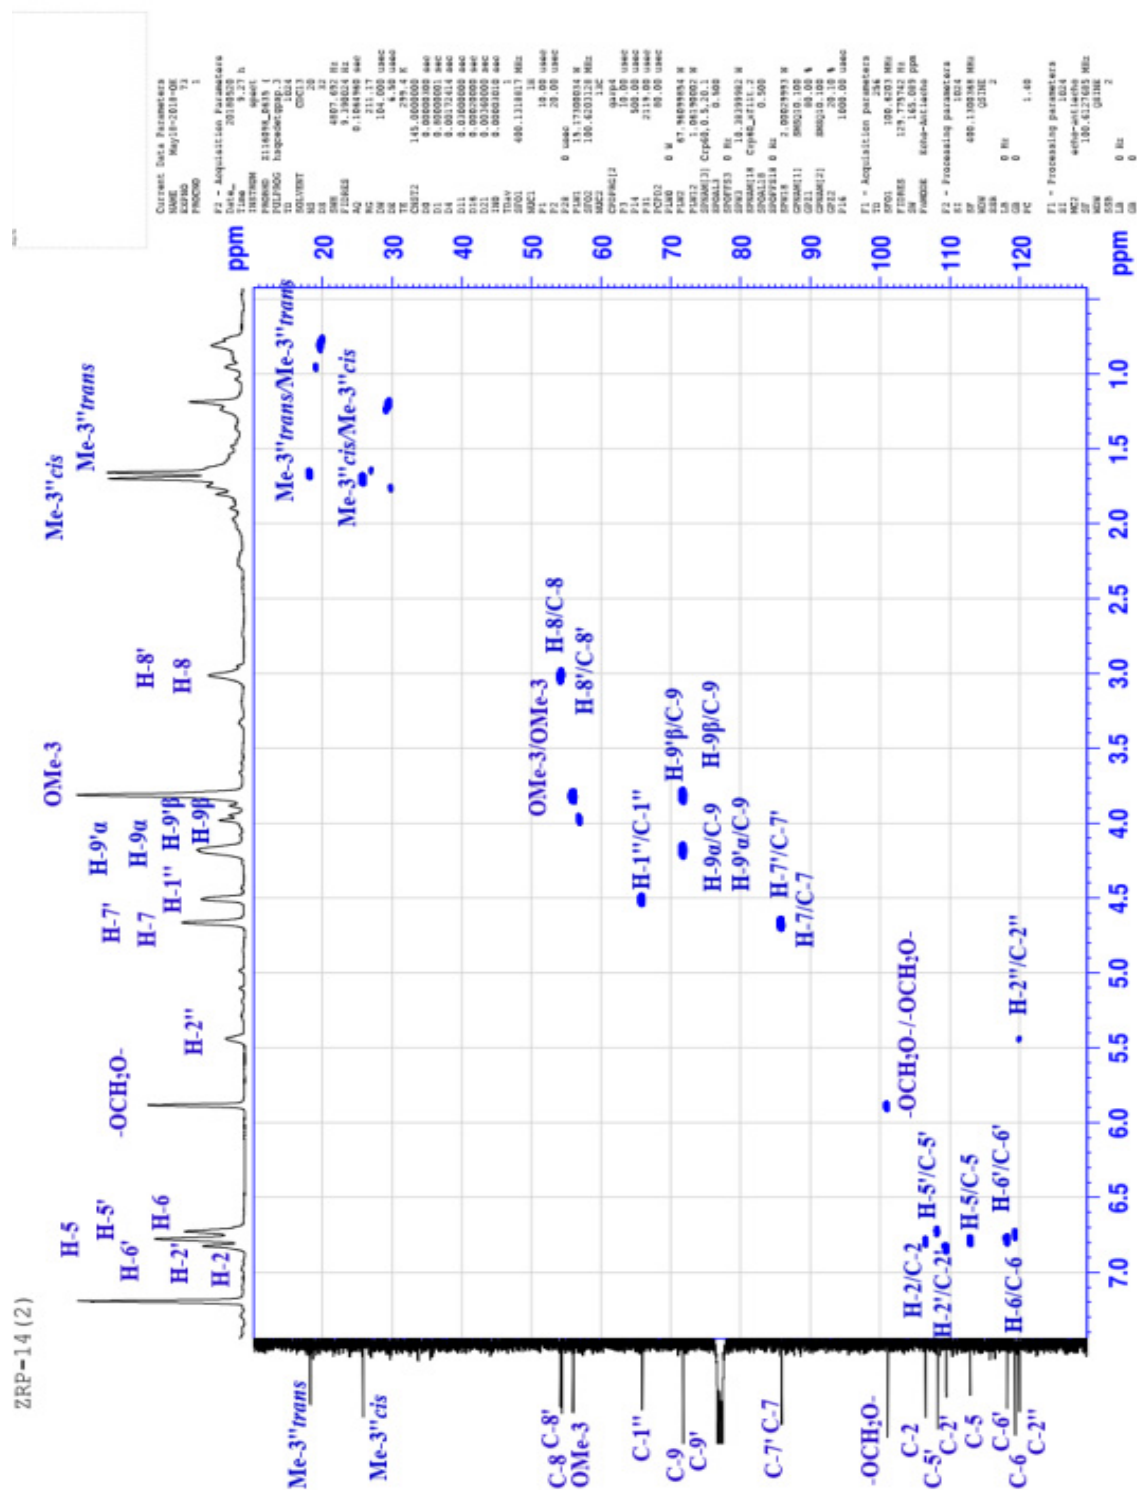



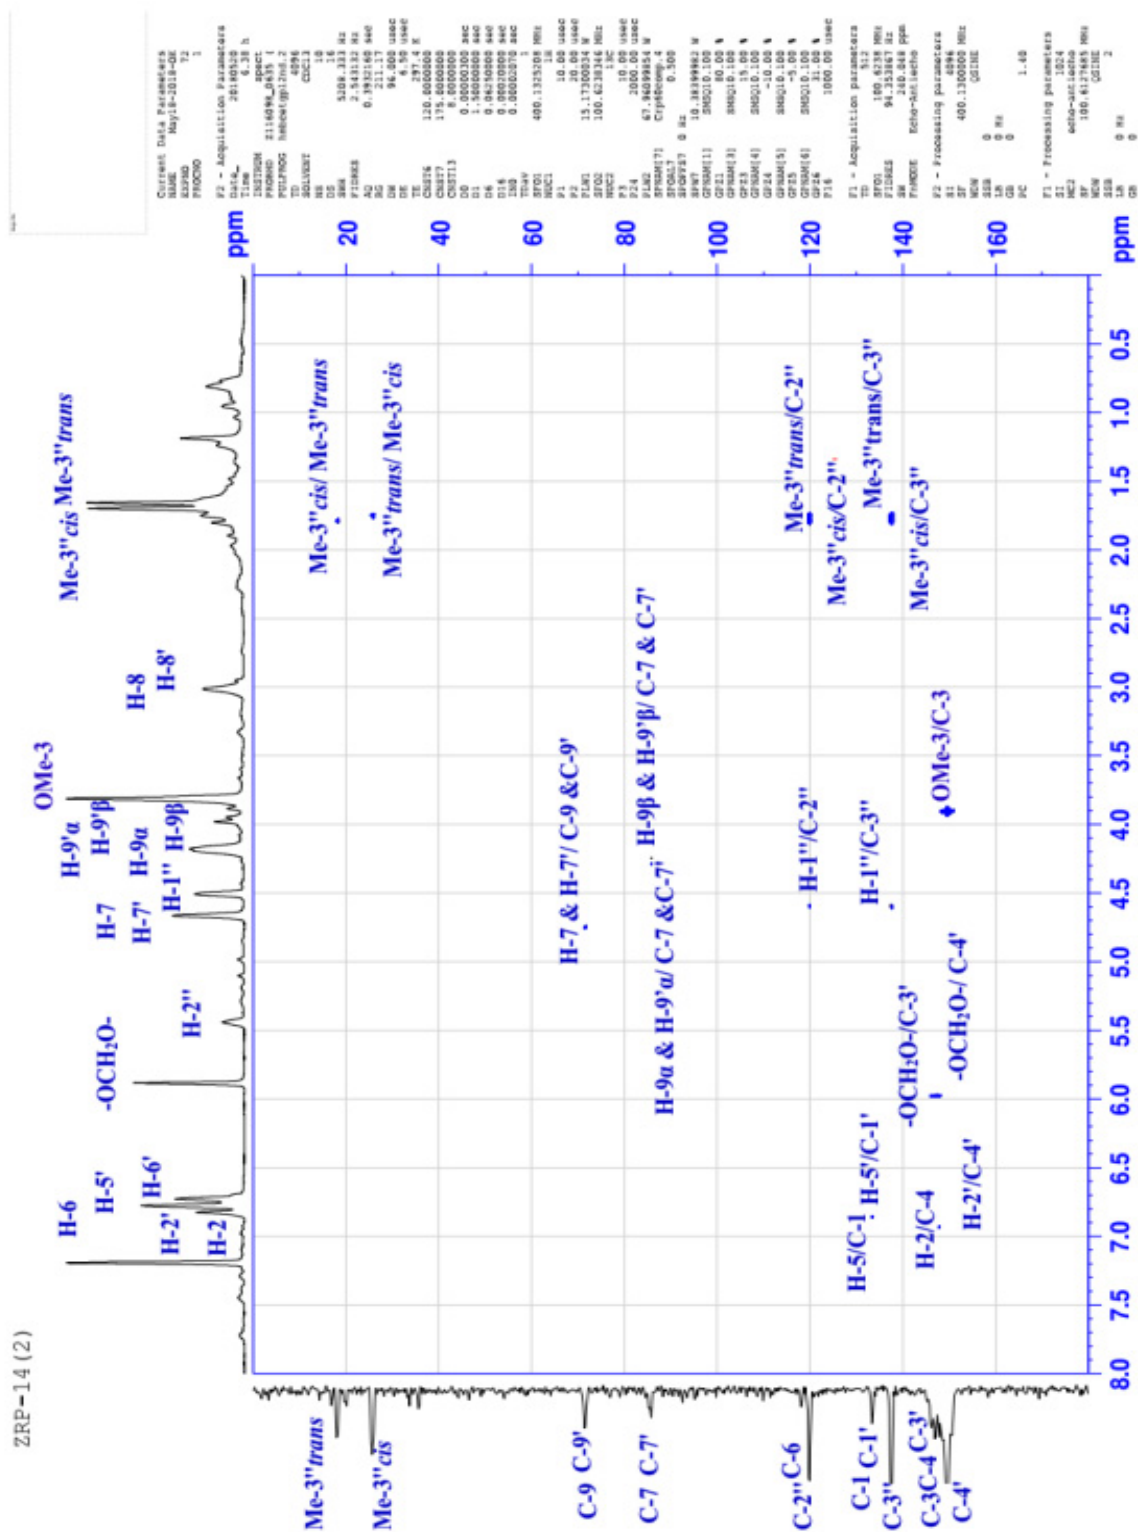

**Figure S22.** HMBC (400 MHz, CDCl<sub>3</sub>) spectrum of compound **8** [ZRC-14 (2)]

### Characterization of compound 9 and compound 10 (ZRP-51) as mixture of $\beta$ -sitosterol and stigmasterol

ZRP-51 was isolated as colorless crystals and produced purple color when sprayed with vanillin in sulphuric acid reagent, followed by heating for 2 minutes. The compounds were appeared as a single spot on a TLC plate and therefore could not be separated from each other.

The  $^1\text{H}$  NMR spectrum (Table S8; Figure S22) showed two singlets at  $\delta$  0.70 and 1.03, assignable to H-18 and H-19 and the other three doublets at  $\delta$  0.95, 0.84 and 0.86 having a coupling constant of  $J = 6.4$ , 7.2 and 7.2 Hz which could be attributed to H-21, H-26 and H-27 respectively. Similarly, in the spectrum a triplet at  $\delta$  0.87 ( $J = 7.2$  Hz) was assigned to H-29. The spectrum also showed an olefinic proton at  $\delta$  5.37 with coupling constant  $J = 5.2$  Hz and a multiplet at  $\delta$  3.55, assignable to H-6 and H-3 of a sterol moiety. Thus compound **10** was identified as  $\beta$ -sitosterol. The structure was further confirmed by comparing its  $^1\text{H}$  NMR data with those published [22].

In addition to the signals discussed for  $\beta$ -sitosterol, the  $^1\text{H}$  NMR spectrum (Table S8, Figure S22) also displayed two olefinic protons at  $\delta$  5.18 and 5.04 (dd,  $J = 15.2$ , 8.6 Hz each) respectively assigned to H-22 and H-23. Three doublets at  $\delta$  1.04, 0.83 and 0.88 with coupling constant  $J = 7.5$ , 7.0 and 6.3 Hz attributed to H-21, H-26 and H-27 respectively. The  $^1\text{H}$  NMR also showed a triplet at  $\delta$  0.83 ( $J = 7.0$  Hz) was assigned to H-29 and two singlets at  $\delta$  0.72 and 1.03, assignable to H-18 and H-19. The spectrum as well showed a doublet of an olefinic proton at  $\delta$  5.37 (d,  $J = 5.2$  Hz) and a multiplet at  $\delta$  3.55, assignable to H-6 and H-3 of a sterol moiety. These  $^1\text{H}$  NMR data were found to be in close agreement to those reported for stigmasterol [22]. Thus compound **9** was identified as stigmasterol.

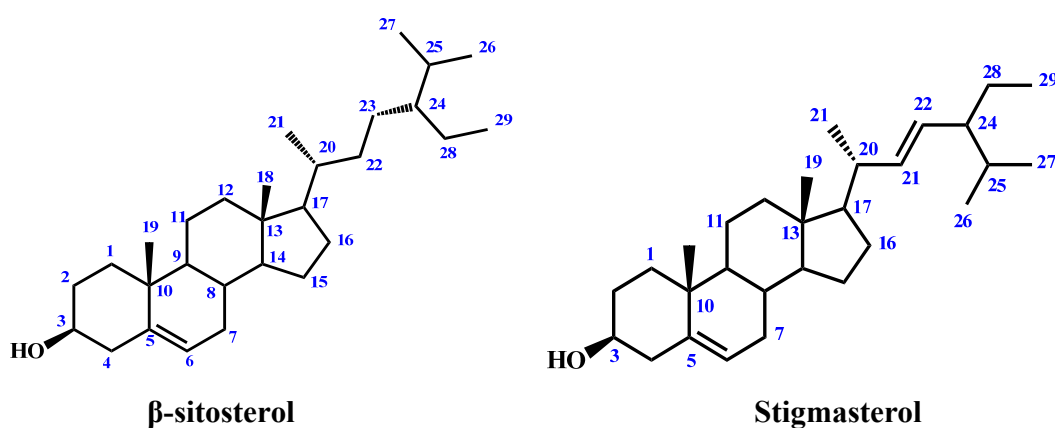

**Table S8. <sup>1</sup>H NMR spectral data (400 MHz, CDCl<sub>3</sub>) for compound 10 and 9 (ZRP-51)**

| Position | Compound 10                 | β-sitosterol<br>[22]        | Compound 9                         | Stigmasterol<br>[22]        |
|----------|-----------------------------|-----------------------------|------------------------------------|-----------------------------|
|          | δ <sub>H</sub>              | δ <sub>H</sub>              | δ <sub>H</sub>                     | δ <sub>H</sub>              |
| 3        | 3.55 m                      | 3.53 m                      | 3.55 m                             | 3.52 m                      |
| 6        | 5.37 d ( <i>J</i> = 5.2 Hz) | 5.37 br s                   | 5.37 d ( <i>J</i> = 5.2 Hz)        | 5.38 br s                   |
| 18       | 0.70 3H, s                  | 0.68 3H, s                  | 0.72 3H, s                         | 0.69 3H, s                  |
| 19       | 1.03 3H, s                  | 1.01 3H, s                  | 1.03 3H, s                         | 1.01 3H, s                  |
| 21       | 0.95 d ( <i>J</i> = 6.4 Hz) | 0.92 d ( <i>J</i> = 6.4 Hz) | 1.04 d ( <i>J</i> = 7.5 Hz)        | 1.02 d ( <i>J</i> = 7.5 Hz) |
| 22       |                             |                             | 5.18 dd ( <i>J</i> = 15.2, 8.6 Hz) | 4.98 1H, m                  |
| 23       |                             |                             | 5.04 dd ( <i>J</i> = 15.2, 8.6 Hz) | 5.14 1H, m                  |
| 26       | 0.84 d ( <i>J</i> = 7.2 Hz) | 0.81 d ( <i>J</i> = 6.4 Hz) | 0.83 d ( <i>J</i> = 7.0 Hz)        | 0.79 d ( <i>J</i> = 6.5 Hz) |
| 27       | 0.86 d ( <i>J</i> = 7.2 Hz) | 0.83 d ( <i>J</i> = 6.4 Hz) | 0.88 d ( <i>J</i> = 6.3 Hz)        | 0.85 (d, <i>J</i> = 6.5 Hz) |
| 29       | 0.87 t ( <i>J</i> = 7.2 Hz) | 0.85 t ( <i>J</i> = 7.5)    | 0.83 t ( <i>J</i> = 7.0 Hz)        | 0.80 (t, <i>J</i> = 7.5 Hz) |

NMR spectrum of compound 9 and 10 as a mixture of  $\beta$ -sitosterol and stigmasterol:

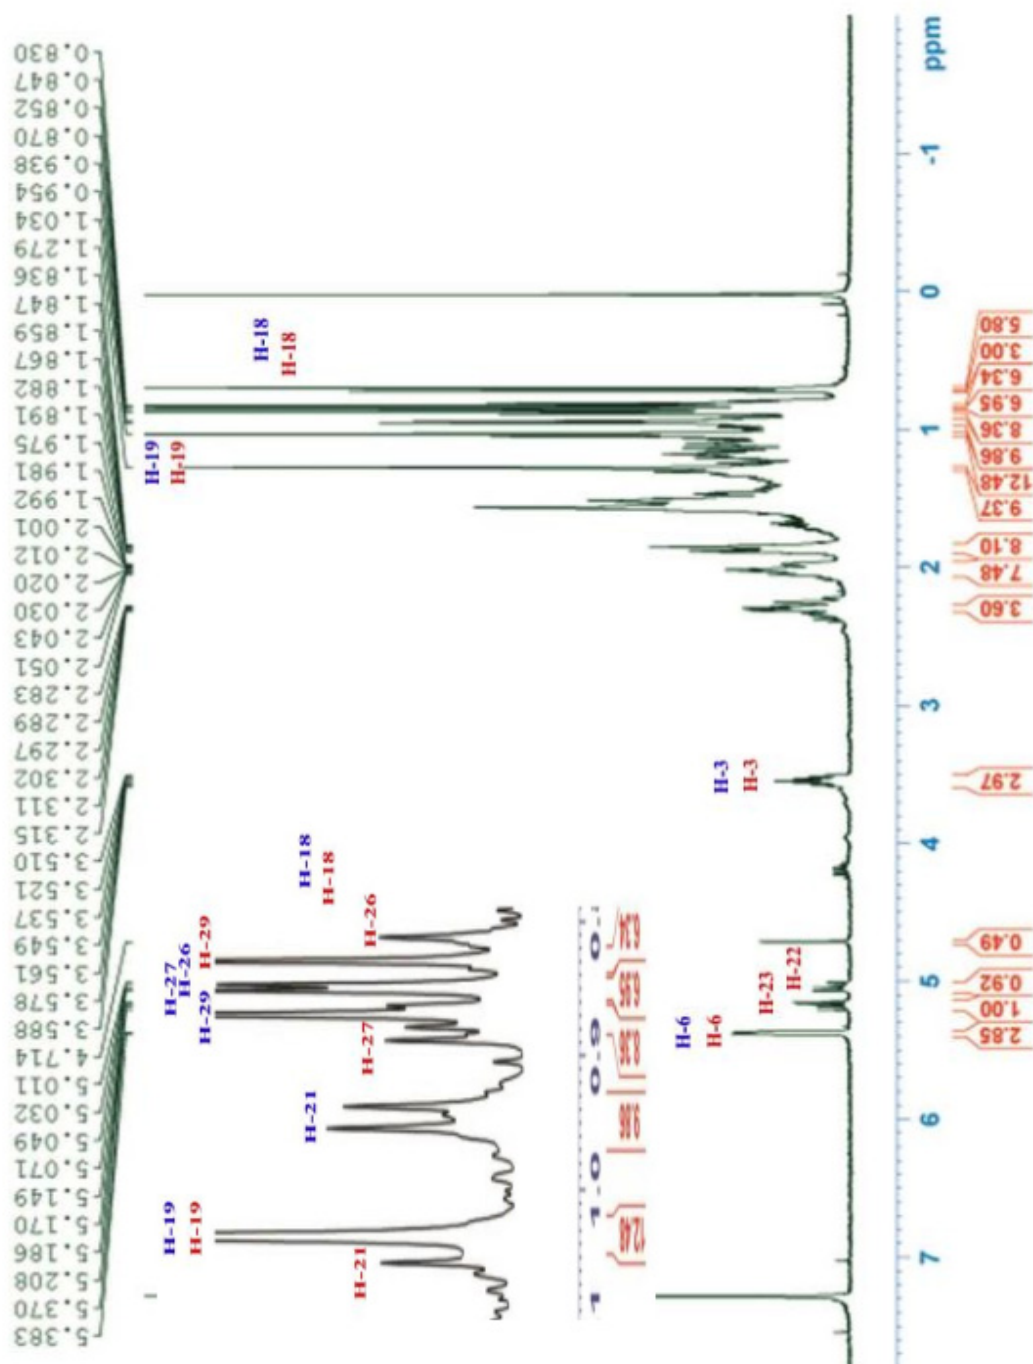

### Characterization of compound 11, compound 12 and compound 13 (ZRP-3) as a mixture of methyl oleate, methyl stearate and stearic acid

Compound **11**, **12** and **13** were obtained as light yellowish liquid, and produced grayish yellow color on a TLC plate when sprayed with vanillin in sulphuric acid reagent followed by heating for 2 minutes. The  $^1\text{H}$  NMR spectral data (500 MHz,  $\text{CDCl}_3$ ; Table S9, Figure S23) showed two olefinic proton multiplets at  $\delta$  5.36 and a methyl triplet at  $\delta$  0.88, which could be assigned to at H-9, H-10 and the terminal methyl group H-18 respectively. The protons resonating at  $\delta$  2.03 (4H, m) are the allylic protons ( $\text{CH}_2\text{-CH=CH}$ ) H-8 and H-11. The protons directly adjacent to the carbonyl group resonated at  $\delta$  2.32 (2H, t,  $J = 7.4$  Hz, H-2) and the  $\text{HOOC-CH}_2\text{-CH}_2$  protons resonated at  $\delta$  1.63 (2H, m, H-3). The methylene protons of the fatty chain appeared at  $\delta$  1.27 (20H, m) assignable to H-4 to H-7 and H-12 to H-17. A methoxy group at  $\delta$  3.68 indicated an esterified fatty acid. All these data permitted the identification of ZRP-3 as methyl oleate (compound **11**). In addition, the spectrum displayed 18 carbon fatty chain consisting of signals at  $\delta$  1.27 m (28H), 1.63 m (2H) and 2.32 t (2H), a terminal methyl at  $\delta$  0.88 t and another methyl ester moiety at  $\delta$  3.68. All these signals allowed identification of compound **12** as methyl stearate. The  $^1\text{H}$  NMR spectrum of ZRP-3 further showed signals similar to compound **12** except the methyl ester group at  $\delta$  3.68, indicating the free fatty acid. Thus, the compound **13** was identified as stearic acid [23].

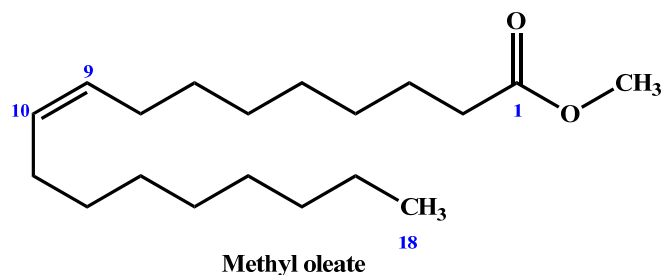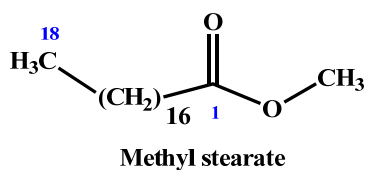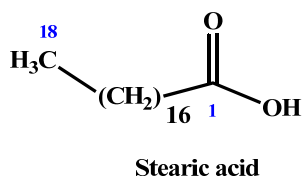

Table S9.  $^1\text{H}$  NMR spectral data (500 MHz,  $\text{CDCl}_3$ ) of compound 11, 12 and 13 (ZRP-3)

|            | Compound 11               | Compound 12               | Compound 13               |
|------------|---------------------------|---------------------------|---------------------------|
| Position   | $\delta_{\text{H}}$       | $\delta_{\text{H}}$       | $\delta_{\text{H}}$       |
| 2          | 2.32 t (2H, $J = 7.4$ Hz) | 2.32 t (2H, $J = 7.4$ Hz) | 2.32 t (2H, $J = 7.4$ Hz) |
| 3          | 1.63 2H, m                | 1.63 2H, m                | 1.63 2H, m                |
| 4-17       | ---                       | 1.27 28H, m               | 1.27 28H, m               |
| 4-7, 12-17 | 1.27 20H, m               | ---                       | ---                       |
| 8, 11      | 2.03 4H, m                | ---                       | ---                       |
| 9, 10      | 5.36 2H, m                | ---                       | ---                       |
| 18-Me      | 0.88 t (3H, $J = 6.8$ Hz) | 0.88 t (3H, $J = 6.8$ Hz) | 0.88 t (3H, $J = 6.8$ Hz) |
| -OMe       | 3.68 3H, s                | 3.68 3H, s                | ---                       |

**Figure S23.**  $^1\text{H}$  NMR (400 MHz,  $\text{CDCl}_3$ ) spectrum values of compound **11**, **12** and **13** (ZRP-3)

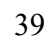

Supplement: s1 [file s1]
